# Supplementary material for: Extensive variation between inbred mouse strains due to endogenous L1 retrotransposition
Source: HighWire-hosted journal article supplement (doi:10.1101/gr.075770.107), 2008-04-01
Supplement: GR-75770AkagiSupp.pdf [file GR-75770AkagiSupp.pdf]

## **Supplementary Materials and Methods.**

### ***Alignment and categorization of WGS sequence traces.***

We aligned ~26 million single WGS sequence traces (average length = 799 nt, minimal Phred quality score > 20, cumulative length = ~18 billion nt), deposited recently at the National Center for Biotechnology Information (NCBI) trace archive (<http://www.ncbi.nlm.nih.gov/Traces/trace.cgi?>) (Wade and Daly 2005), against the reference C57 genome assembly (build36/mm8, release Feb. 2006) using GMAP (Fig. 1, Supplementary Fig. 1). This program was developed to map cDNA sequences to genomic locations and is well-suited to break contiguous sequences into exons and introns (Wu and Watanabe 2005). However, its use in mapping genomic sequence traces and finding insertions and deletions (indels) has not been reported previously (Stephens et al. 2008). Our use of GMAP sped alignments by a factor of 10 to 100-fold over other computational methods such as Blat (R. M. Stephens, N. Volfovsky, unpublished observations). Some of the WGS traces initially were assembled into an amalgam of mixed strains' genomic sequences (previously available by subscription from Celera), but this “fusion assembly” was not used here.

An “alignment score”, assigned to each single sequence trace based on its quality of alignment, was defined as:

$$\text{alignment score} = \text{length of coverage} \times \% \text{ identity.}$$

Each trace was aligned by GMAP against all portions of the reference sequence, starting in chromosome 1, and the highest alignment scores were tallied. The GMAP algorithms and further details are available upon request.

A custom Perl script was developed to filter GMAP output files. Based in part on the maximum alignment score(s), each trace first was categorized according to whether or not GMAP aligned it to a unique C57 locus (Supplementary Fig. 1, Supplementary Table 2).

Sequence traces that failed to align to unique genomic locations were not mapped further.

We subsequently found that such “nopath” traces either aligned with approximately equal Blat scores (Hinrichs et al. 2006) at numerous genomic locations, or in rare cases did not align to any locations. Such nopath traces were examined using RepeatMasker (Smit et al. 2007), showing they are overwhelmingly repetitive element sequences of both simple and other known repeat classes. GMAP identified another category of traces that aligned well at several discrete genomic loci. Approximately one-third of these traces showed a single best alignment (with one alignment score at least 5% better than those for other loci).

Using this best alignment, such traces were mapped and categorized further

(Supplementary Fig. 1). The remaining two-thirds of this category showed multiple nearly identical alignments that could not be distinguished further (“nobestpath”). These latter traces subsequently were found by RepeatMasker to comprise lower copy number genomic repeats such as segmental duplications. Traces that could not be uniquely mapped to the genome were set aside.

Remaining traces were categorized into additional groups depending on the number of well-aligned patches of contiguous sequence (Supplementary Fig. 1). For those traces that mapped as a single high scoring pair (HSP), i.e. over a single contiguous patch of alignment, two distinct categories were defined. Approximately 73% of all 26 million traces aligned well over essentially their entire length (*i.e.*, “traces with minimal variation”). Others (approximately 8%) aligned well over only part of their length (“polymorphism in strain X”). Such traces were filtered into strong and weak alignment groups based on their alignment scores and several other criteria. Traces predicting polymorphisms in strain X were analyzed further as described below.

Almost all variants described here were identified from unassembled strain WGS traces that aligned to the reference genome with 90% identity and at least 200 nt at both (5’ and 3’) ends. We focused upon 100 nt – 10 kb variants present in the C57 genome but absent from other strain(s) (Fig. 1 and Supplementary Fig. 1). Such variants were distinguished from “weakvariants” based on the presence of two aligned patches (HSPs) within a sequence trace, the distance separating the HSPs (> 100 nt), lengths of each HSP segment (> 200 nt), and alignment scores. Traces containing more than 2 HSPs were identified but not analyzed further here; a majority contains another class of highly repetitive sequences. Some variants were confirmed subsequently by Blat alignment (Hinrichs et al. 2006) against the reference genome.

Categorized trace information was loaded into relational databases using Mysql v. 5.05. Comparing traces’ genomic coordinates to those of repetitive elements (Smit et al. 2007),

we found another ~ 5% of the traces aligned entirely within repeat elements, i.e. mainly L1 or LTR elements. These traces were excluded from subsequent analysis because they could not be mapped by themselves to a unique genomic locus.

For genomic sequencing, DNA fragments had been narrowly size fractionated and cloned into library plasmids for bidirectional sequencing, facilitating pairing of most sequence traces with AS trace “mates” separated by several kb or more. Therefore, in limited cases we used trace mate-pair information (downloaded from NCBI tracedb archive) to validate single trace alignments by GMAP. Frequently, a trace could be mapped uniquely even when its mate could not. Well-aligned mates accompany approximately 80-85% of all traces, regardless of categorization after GMAP alignments (Supplementary Table 2). However, it must be emphasized that all of the variants described in this study were identified by single sequence trace alignments without mate-pair information. We incorporated mate-pairs as an optional track in PolyBrowse (<http://polybrowse.abcc.ncifcrf.gov/>) (Stephens et al. 2008).

### ***Merging overlapping traces.***

WGS traces may align redundantly to the same genomic locus. To avoid overcounting genomic features or variants, we performed two merging procedures (Fig. 1 and Supplementary Fig. 1). In the first, overlapping traces identifying a common variant in the reference genome were merged into a “unique insertion polymorphism in C57”. Each trace’s two HSPs were represented by coordinates ( $i_1, i_2, i_3, i_4$ ), where  $i_1$  = chromosomal coordinate at alignment start (mm8, Feb. 2006 release);  $i_2$  = coordinate at variant start;  $i_3$  =

coordinate at variant end; and  $i_4$  = coordinate at alignment end. A merged variant was defined using the group of all aligned traces where any pair of aligned traces  $i$  and  $j$  satisfies  $|i_2 - j_2| < 100$ ; its final coordinates were defined as:

$$c_1 = \min(i_1); c_2 = \max(i_2); c_3 = \min(i_3); \text{ and } c_4 = \max(i_4).$$

Using this procedure, we identified unique variants, thereby significantly reducing the number of features analyzed (Supplementary Table 1).

In a second procedure, overlapping traces with minimal variation were merged with others separated by  $< 50$  nt, forming merged contigs (Fig. 1 and Supplementary Fig. 1). We assigned reference genome coordinates ( $i_1, i_2$ ) to each well-aligned trace. Two such traces  $i$  and  $j$ , where  $i_1 < j_1$ , were merged if  $j_1 - i_2 < 50$  or  $i_2 - j_1 > 0$ . If two neighboring alignments satisfy these criteria, the final coordinates of the merged contig are ( $i_1, j_2$ ).

### ***Statistical analysis of coincident L1 polymorphisms and SNP-dense regions.***

To calculate SNP densities, reference genome sequences were divided into 100 kb blocks. For each block, the number of SNPs from pairwise strain comparisons was determined. A total of 1,233,499 SNPs was downloaded from dbSNP (NCBI) for A/J vs. C57, and 1,111,548 SNPs for DBA/2J vs. C57. High SNP density and low SNP density regions were defined using a threshold of  $>100$  SNPs per 100 kb. High-SNP blocks comprise 20.1% of the genome (comparing A/J vs. C57), and 17.1% (DBA/2J vs. C57), respectively (Wade et al. 2002). Of L1 polymorphisms in C57, 51.4% occurred in high-SNP blocks (A/J vs. C57), significantly higher than their genome-wide frequency ( $p\text{-value} < 1.95\text{E-}13$ ) by the

binomial test(Wiltshire et al. 2003). Similarly, the rate for DBA/2J was 46.1%, significantly higher than its genome-wide rate (p-value <1E-10 ).

### ***Structural analysis of transposons.***

TSDs (short direct repeats) generally flank retrotransposon insertions and are hallmarks of recent transposition events. Therefore, we examined genomic L1s using a custom Perl program, modified from Szak et al. (Szak et al. 2002), to characterize potential TSDs flanking each element. We limited analysis to elements longer than 100 nt and less than 10 kb. Elements with 5' inversions, or 5' or 3' transductions were also excluded. Fragmented L1s (based upon RepeatMasker annotation) were merged. To identify TSDs between 9 nt and 200 nt long, flanking genomic sequences (200 nt upstream and downstream of reference L1s) were analyzed using bl2seq (with parameters: -g F -W 9 -F F -S 1 -d 3000 -e 1000.0). Right and left genomic flank sequences were scanned for repetitive oligonucleotide “words” starting at 20 nt and decreasing until repeated words were or were not identified at length 7. In the latter case, no TSD sequence was tabulated.

Candidate poly(A) tails were identified in the 200 nt downstream of the 3' UTR of candidate transposon integrants, based upon a minimum length of 6 nt and at least 73% As. Tails containing more than two adjacent non-A bases were disallowed. These criteria were relaxed if patterned repeats were detected in a poly(A) tract (e.g. AAT).

The genomic contexts of candidate transposons were examined. To determine GC nucleotide content flanking transposons, 5 kb genomic sequences upstream and

downstream of integrants were analyzed. GC content was calculated as the total number of G or C bases in a sequence, divided by the total number of non-N (called) bases in the same sequence. Distances and orientations of variants were determined relative to RefSeq genes, expressed sequence tags (ESTs), and CpG islands. RefSeq genes (19,557 genes), knownGenes (31,863), MGC genes (17,255), and ESTs (4,415,882) were used to identify the nearest gene within 100 kb of each L1.

To validate predicted empty target site loci, unrepeated TSD sequences were sought in corresponding trace sequences. This search continued until candidate sequences flanking insertion polymorphisms were or were not identified at a minimum length of seven nt. In the latter case, no TSD sequence was tabulated. Output files were generated, along with a simulated alignment of the entire region, for statistical analysis.

***Re-classification of L1 subtypes (A, T<sub>F</sub>, and G<sub>F</sub>).***

Occasionally, RepeatMasker breaks one continuous mouse L1 sequence into two separate fragments with the same or different subfamily designation (Chen et al. 2006; Smit et al. 2007). We merged two or more L1 retrotransposon fragments if they satisfied two criteria: (1) the two fragments must be adjacent, virtually contiguous sequences (overlapping, juxtaposed or separated by a gap < 10 nt); and (2) the difference of their nucleotide substitution rates (compared with consensus subfamily sequences) was less than 5%. The L1 subtype of the merged sequence was defined to be the subtype of the larger fragment.

To reclassify candidate young L1 family members (A, T<sub>F</sub> and G<sub>F</sub>), merged genomic sequences (> 100 nt) were aligned against L1Md\_A2 for L1Md\_A, L1Md\_G<sub>F</sub>62 for L1Md\_G<sub>F</sub>, and L1spa for L1Md\_T<sub>F</sub>, respectively, using Cross\_match (downloaded from <http://www.phrap.org>). L1s were re-classified to the subfamily whose representative member gave the best alignment score. After reclassification of RepeatMasker output, our counts of L1 subfamily members genome-wide corroborate several prior estimates (Supplementary Table 3).

### ***Chromosomal analysis.***

Chromosomal sequences (mm8, Feb. 2006 assembly from UCSC browser) (Hinrichs et al. 2006) was divided into non-overlapping, contiguous 100 kb windows. Densities of transposons (annotated by RepeatMasker) and exons (RefSeq) were calculated for each 100 kb window.

### ***Identification of fusion transcripts containing transposons.***

Reference genome coordinates of transposons, RefSeq genes and ESTs (UCSC annotation) were determined. Transcripts with exons mapping inside or within 50 nt outside of transposons were tabulated.

To detect fusion transcripts containing L1T<sub>F</sub> fragments (or other young L1 family members), a double-stranded DNA probe for mouse L1spa ORF1 was generated by PCR using primers DES1167 (5' ACTAAAACAGGAACCAAGACCAC 3') and DES1168 (5' GTTCATTTCATCACCTGTTTGTATG 3'). A mouse L1spa ORF2 probe was generated



using DES1165 (5' CAATACAAGAACGGGAACAAC 3') and DES1166 (5' ACCTTTGATGAGAATGAAGTGTC 3'). PCR amplification was performed for 30 cycles at 94°C for 30s, 58°C for 30s, and 72°C for 1 min, and products were gel purified prior to radiolabelling with alpha-32P dCTP (random nonamer labeling kit, GE Amersham).

Commercial phage libraries representing mouse testis large-insert cDNAs (Clontech) or thymus cDNAs (Stratagene) were plated at about 50,000 plaques per 150 x 15 mm Petri dish and transferred to Hybond-N filters (Amersham). Filters were hybridized in 1x Denhardt's solution (pH 7.5), containing 1 mM EDTA, pH 8.0, 0.2mg/ml sheared and denatured fish sperm DNA (Roche) and 1% SDS, with radiolabeled ORF2 probe, washed at 65°C in 0.1X SSC and 0.1% SDS, and exposed to film. Filters were subsequently rehybridized with ORF1 probe and autoradiographed again. Those plaques that hybridized to the ORF1 probe, but not with ORF2 (so-called ORF1<sup>+</sup>ORF2<sup>-</sup> cDNAs) (Li et al. 2008), were enriched by screening until they were purified to homogeneity. Positives were converted to plasmids following the library manufacturers' directions.

### ***DNA sequencing and analysis.***

Plasmids containing cDNA or genomic DNA inserts were purified using miniprep columns. Sequencing was performed using standard fluorescent dideoxy terminator chemistry (Big Dye v. 3.1, Applied Biosystems) on a 96 capillary electrophoresis instrument (Spectrumedix) using oligonucleotides for the testis cDNA library plasmid's 5' and 3' ends, respectively, i.e. DES886 (5'-AAGCGCGCCATTGTGTTGG 3') and

DES837 (5' TAATACGACTCACTATAGGG 3'), M13R and M13F oligonucleotides for thymus cDNA and genomic DNA clones, and custom oligonucleotides for additional sequencing by primer walking (sequences available upon request).

### **Supplementary information.**

#### ***Resolution of conflicting traces.***

A single discrepancy was observed in validating predicted variants by PCR. A “weakvariant” trace predicted an L1 insertion polymorphism in the C57 genome and its absence from A/J. However, another trace with minimal variation, also from A/J, indicated its presence in A/J. PCR unequivocally demonstrated the presence of this L1 integrant in A/J. Explanations for this discrepancy include an error in trace identification; contamination of strains or DNA specimens prior to sequencing or our PCR assays, including unexpected heterozygosity at the locus; an unexpected copy number variant or segmental duplication of the locus; or an independent, concurrent L1 insertion into the identical location (which would be extremely unlikely).

#### ***Polymorphic AS L1s in genes.***

Almost all 336 L1 variants that are full-length (*i.e.* they contain at least one 5' UTR monomer) and occur within annotated genes in the reference genome are intronic. Approximately 60% are oriented AS to flanking ORFs (Supplementary Table 9) and are members of the T<sub>F</sub>, A and G<sub>F</sub> subfamilies. These represent 9% of all polymorphic L1 T<sub>F</sub>, A and G<sub>F</sub> elements (N = 3,974; Supplementary Table 3) and 20% of full-length L1 polymorphisms genome-wide (N = 1,714; Supplementary Table 6a).

## Supplementary Figure Legends.

Supplementary Fig. 1. **Categories of WGS sequence trace alignments.** To discover polymorphisms between inbred mouse strains, available WGS sequence traces were aligned to the C57 reference genome using GMAP. Resulting categories of trace alignments included “well-aligned”, “insertion polymorphism in C57” and “insertion polymorphism in strain X”. Overlapping well-aligned traces were merged, forming larger contigs. Similarly overlapping traces identifying insertion polymorphisms were merged to define unique indels.

Supplementary Fig. 2. **Detection and display of mouse strain polymorphisms.** (a) Individual WGS sequence traces from four alternative strains aligned to the C57 reference genome at *ArhGAP15*. The number of aligned traces (vertical axis) at each chromosomal position (horizontal axis) is related to the overall sequence coverage density (Table S1). The coverage abruptly drops to zero at the genomic boundary of a L1 polymorphism, indicating its likely absence in all four unassembled strains and presence in the C57 reference genome. (b) PolyBrowse, a web-based display and query browser, can display annotated genes, other reference genome features and strain variants including single nucleotide polymorphisms (SNPs) and indels. Individual traces from unassembled strains are aligned to C57 reference sequence at the *ArhGAP15* locus on chr. 2 (Stephens et al. 2008). (c) Coverage density of aligned, merged WGS traces (number of nucleotides aligned per 100 kb windows) is displayed as a histogram along chromosome 1 for each of the four analyzed strains: purple, DBA/2J; green, A/J; orange, 129X1; pink, 129S1.

Supplementary Fig. 3. **Polymorphic L1s are recent genomic integrants.** (a) L1 polymorphisms in the reference genome (insertion polymorphisms in C57, absent from at least one of the unassembled strains); (b) non-polymorphic L1s; and (c) reference L1s. Histograms indicate counts of elements with indicated features: (*Left*) count of L1s with target site duplications of indicated lengths (nt); (*middle*) count of L1s with poly(A) tails of indicated lengths (nt); (*right*) target nick site nucleotide frequency (Symer et al. 2002). Recent L1 retrotransposition integrants are expected to include more full-length elements, longer target site duplications (TSDs), longer poly(A) tails, and canonical target nick site at TT<sup>^</sup>AAAA (Symer et al. 2002). See Fig. 4.

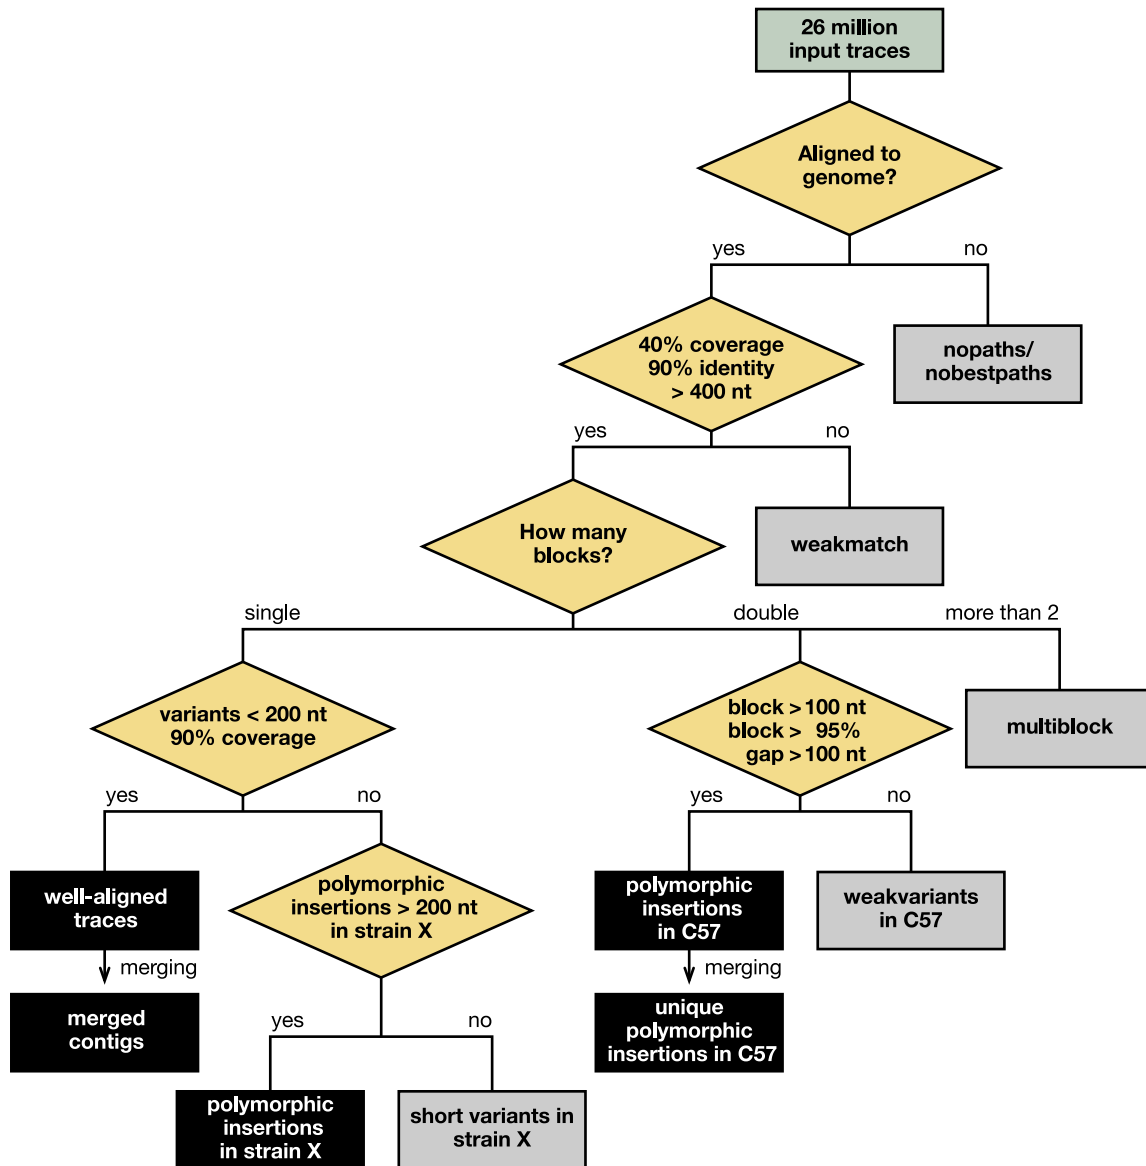

Supplementary Figure 1

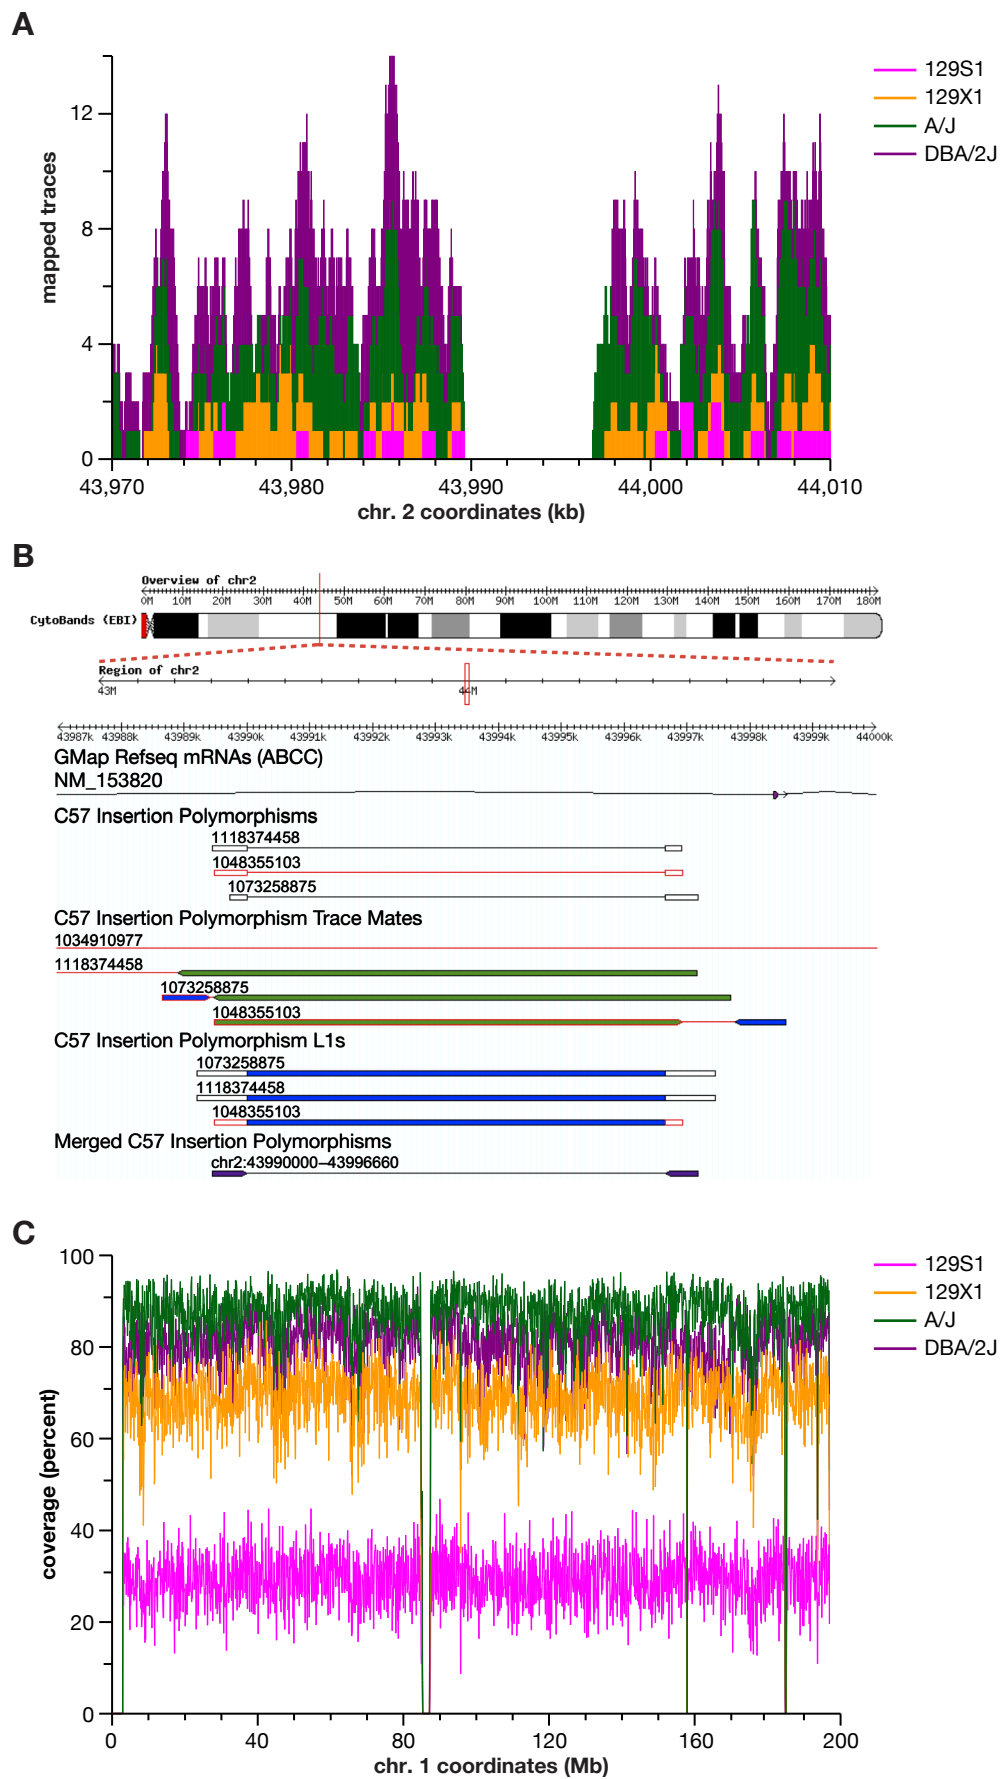

Supplementary Figure 2

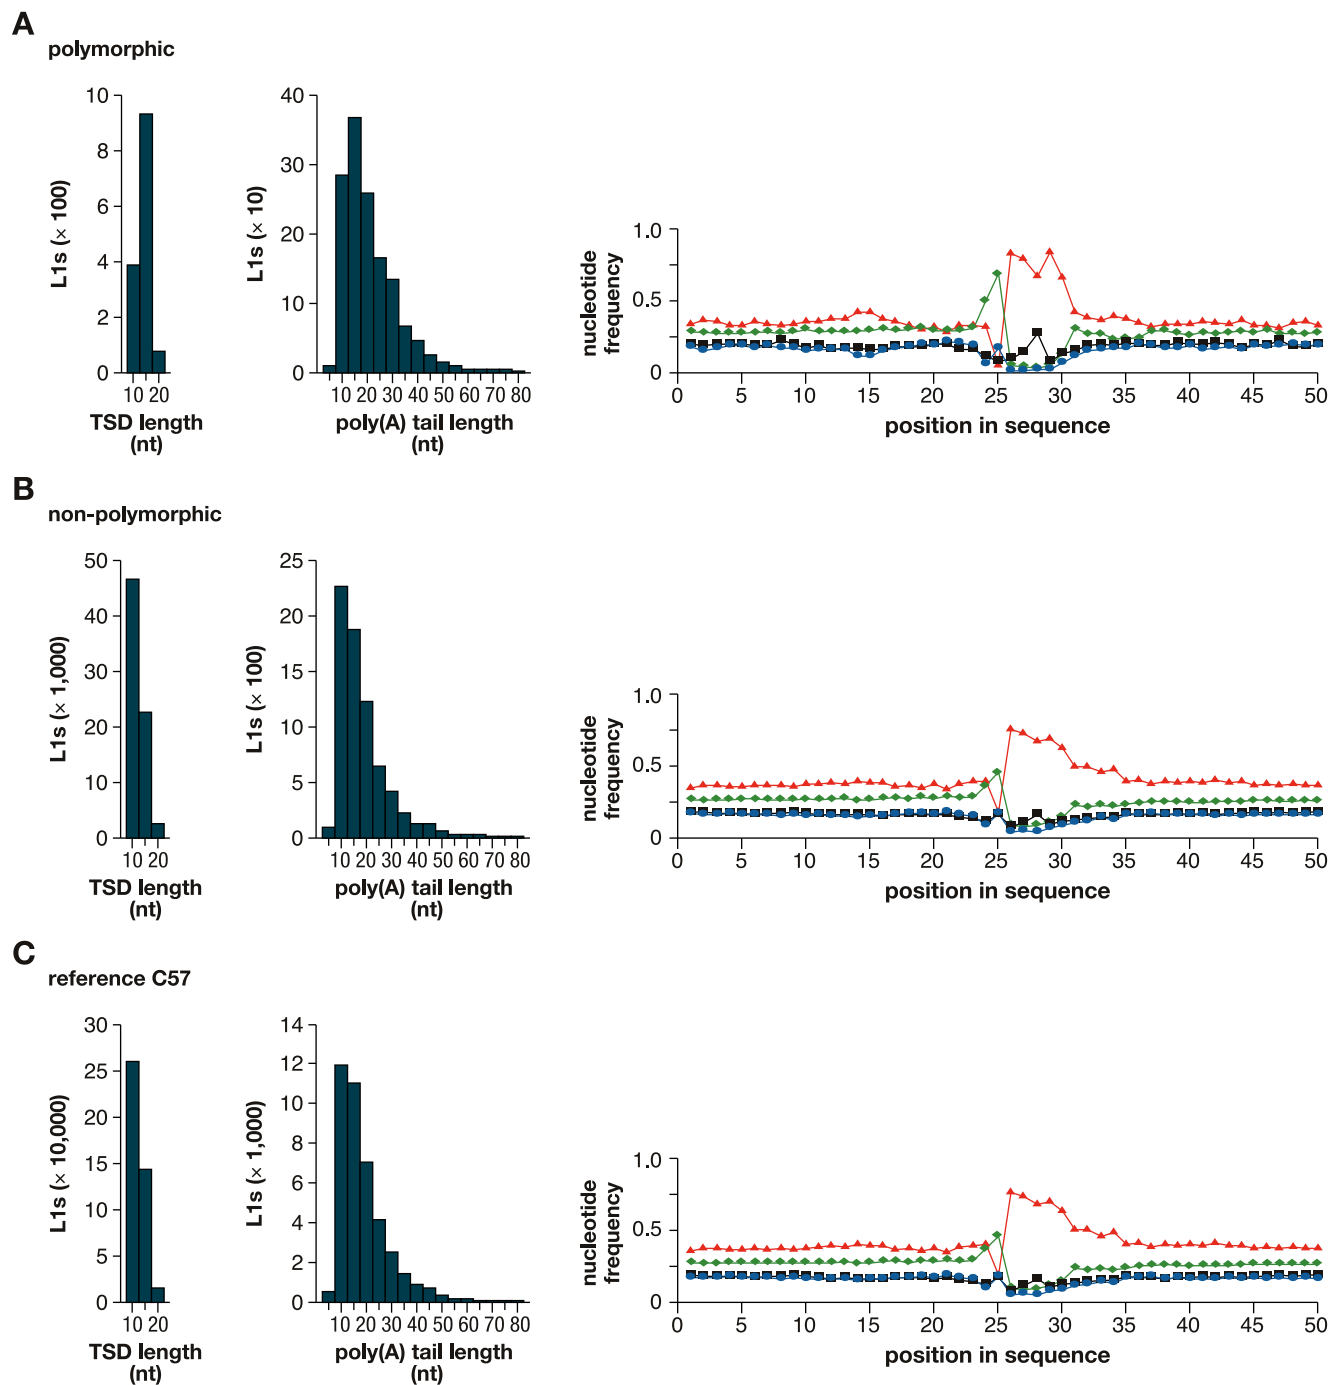

Supplementary Figure 3

Supplementary Table 1. **Reduction in overlapping trace counts by merging.**

| Type of<br><u>alignment</u> | <u>129S1</u>  |                | <u>129X1</u>  |                | <u>A/J</u>    |                | <u>DBA/2J</u> |                |
|-----------------------------|---------------|----------------|---------------|----------------|---------------|----------------|---------------|----------------|
|                             | <u>traces</u> | <u>contigs</u> | <u>traces</u> | <u>contigs</u> | <u>traces</u> | <u>contigs</u> | <u>traces</u> | <u>contigs</u> |
| min.variation               | 1,116,193     | 758,235        | 4,022,174     | 1,063,807      | 7,934,277     | 688,930        | 5,801,176     | 897,164        |
| insert in C57               | 4,628         | 2,132          | 15,253        | 5,928          | 33,252        | 10,238         | 24,694        | 8,449          |

Traces with minimal variation and those identifying insertion polymorphisms in C57 are counted before and after merging into contigs for each unassembled strain.



Supplementary Table 2. **Categories of trace alignments.** Trace alignment categories, organized by strain of origin, repeat content, co-align with mate traces, and average size. Regardless of alignment category, most traces co-aligned with nearby mates at similar frequencies, suggesting alignment procedures correctly assigned most traces to reference genome loci. (See Fig. 1 and Supp. Fig. 1 for more description about alignment categories.)

### Traces with minimal variation by strain

| strain          | traces     |         | mates      |         | repeats (some traces have multiple repeats) |         | average size of single repeat, nt |             | traces with one or more repeats |         |
|-----------------|------------|---------|------------|---------|---------------------------------------------|---------|-----------------------------------|-------------|---------------------------------|---------|
|                 | number     | percent | number     | percent | number                                      | percent | trace size                        | repeat size | number                          | percent |
| 129S1_SVIMJ_CRA | 1,118,796  | 5.62%   | 935,330    | 83.60%  | 1,292,561                                   | 115.53% | 795.73                            | 193.13      | 766,523                         | 68.51%  |
| 129X1_SVJ_CRA   | 4,031,241  | 20.25%  | 3,241,169  | 80.40%  | 4,533,969                                   | 112.47% | 798.11                            | 191.59      | 2,717,591                       | 67.41%  |
| A_J_CRA         | 7,953,029  | 39.95%  | 6,835,140  | 85.94%  | 9,189,658                                   | 115.55% | 800.59                            | 193.08      | 5,445,332                       | 68.47%  |
| C57BL6_J_HPGC   | 322,757    | 1.62%   | 0          | 0.00%   | 381,387                                     | 118.17% | 890.47                            | 158.14      | 210,727                         | 65.29%  |
| C57BL_6J_BCM    | 668,329    | 3.36%   | 283,142    | 42.37%  | 856,205                                     | 128.11% | 919.03                            | 187.30      | 476,776                         | 71.34%  |
| DBA_2J_CRA      | 5,812,166  | 29.20%  | 4,837,970  | 83.24%  | 6,703,650                                   | 115.34% | 799.71                            | 194.27      | 3,971,577                       | 68.33%  |
| total           | 19,906,318 | 100.00% | 16,132,751 | 81.04%  | 22,957,430                                  | 115.33% | 833.94                            | 186.25      | 13,588,526                      | 68.26%  |

### Traces with minimal variation, by repeat size range

| repeat size range, nt | repeats    |         | traces with repeats |         |
|-----------------------|------------|---------|---------------------|---------|
|                       | number     | percent | number              | percent |
| 0-200                 | 16,315,292 | 71.07%  | 5,802,662           | 42.70%  |
| 201-400               | 3,592,010  | 15.65%  | 3,336,480           | 24.55%  |
| 401-600               | 1,279,707  | 5.57%   | 1,822,477           | 13.41%  |
| 601-800               | 1,293,686  | 5.64%   | 2,020,124           | 14.87%  |
| 801-                  | 476,735    | 2.08%   | 606,783             | 4.47%   |
| total                 | 22,957,430 | 100.00% | 13,588,526          | 100.00% |

LINE/L1: 22.74%, Simple repeat: 22.25%, SINE/Alu: 10.25%, LTRs: 17.96%

# Traces identifying insertion polymorphisms in C57

## Variant traces by strain

| strain          | traces |         | mates  |         | repeats |         | average size, nt |             | traces with repeats |         |
|-----------------|--------|---------|--------|---------|---------|---------|------------------|-------------|---------------------|---------|
|                 | number | percent | number | percent | number  | percent | trace size       | repeat size | number              | percent |
| 129S1_SVIMJ_CRA | 2,376  | 5.95%   | 2,024  | 85.19%  | 3,182   | 133.92% | 793.62           | 191.35      | 1,767               | 74.37%  |
| 129X1_SVJ_CRA   | 7,731  | 19.36%  | 6,321  | 81.76%  | 10,335  | 133.68% | 795.71           | 189.19      | 5,798               | 75.00%  |
| A_J_CRA         | 16,742 | 41.92%  | 14,502 | 86.62%  | 23,138  | 138.20% | 799.35           | 190.76      | 12,789              | 76.39%  |
| C57BL6_J_HPGC   | 202    | 0.51%   | 0      | 0.00%   | 281     | 139.11% | 902.35           | 162.13      | 149                 | 73.76%  |
| C57BL_6J_BCM    | 421    | 1.05%   | 158    | 37.53%  | 640     | 152.02% | 909.54           | 177.44      | 335                 | 79.57%  |
| DBA_2J_CRA      | 12,465 | 31.21%  | 10,404 | 83.47%  | 17,065  | 136.90% | 797.93           | 188.80      | 9,373               | 75.19%  |
| total           | 39,937 | 100.00% | 33,409 | 83.65%  | 54,641  | 136.82% | 833.08           | 183.28      | 30,211              | 75.65%  |

## Variant traces by repeat size range

| repeat size range, nt | repeats |         | traces with repeats |         |
|-----------------------|---------|---------|---------------------|---------|
|                       | number  | percent | number              | percent |
| 0-200                 | 37,864  | 69.30%  | 10,894              | 36.06%  |
| 201-400               | 9,896   | 18.11%  | 8,322               | 27.55%  |
| 401-600               | 4,058   | 7.43%   | 5,493               | 18.18%  |
| 601-800               | 2,152   | 3.94%   | 4,397               | 14.55%  |
| 801-                  | 671     | 1.23%   | 1,105               | 3.66%   |
| Total                 | 54,641  | 100.00% | 30,211              | 100.00% |

LINE/L1: 23.90%, Simple repeat: 19.68%, SINE/Alu: 11.24%, LTRs: 20.5%

Nopath: no alignment hit at all

#### nopaths by strain

| Strain          | traces  |         | mates  |         | repeats |         | average size, nt |             | traces with repeats |         |
|-----------------|---------|---------|--------|---------|---------|---------|------------------|-------------|---------------------|---------|
|                 | number  | percent | number | percent | number  | percent | trace size       | repeat size | number              | percent |
| 129S1_SVIMJ_CRA | 6,257   | 2.56%   | 5,148  | 82.28%  | 9,863   | 157.63% | 808.16           | 200.53      | 4636                | 74.09%  |
| 129X1_SVJ_CRA   | 25,687  | 10.50%  | 19,982 | 77.79%  | 36,032  | 140.27% | 811.33           | 189.48      | 18425               | 71.73%  |
| A_J_CRA         | 53,920  | 22.04%  | 44,633 | 82.78%  | 79,686  | 147.79% | 815.83           | 181.53      | 38193               | 70.83%  |
| C57BL6_J_HPGC   | 91,509  | 37.40%  | 0      | 0.00%   | 17,547  | 19.18%  | 1,017.91         | 117.77      | 11650               | 12.73%  |
| C57BL_6J_BCM    | 32,107  | 13.12%  | 424    | 1.32%   | 4,352   | 13.55%  | 850.34           | 123.16      | 2875                | 8.95%   |
| DBA_2J_CRA      | 35,204  | 14.39%  | 28,348 | 80.52%  | 53,686  | 152.50% | 812.05           | 214.23      | 26394               | 74.97%  |
| total           | 244,684 | 100.00% | 98,535 | 40.27%  | 201,166 | 82.21%  | 852.60           | 171.11      | 102,173             | 41.76%  |

#### nopaths by repeat size range

| repeat size range, nt | repeats |         | traces with repeats |         |
|-----------------------|---------|---------|---------------------|---------|
|                       | number  | percent | number              | percent |
| 0-200                 | 153,977 | 76.54%  | 39,968              | 39.12%  |
| 201-400               | 18,811  | 9.35%   | 20,219              | 19.79%  |
| 401-600               | 8,041   | 4.00%   | 14,717              | 14.40%  |
| 601-800               | 15,443  | 7.68%   | 21,527              | 21.07%  |
| 801-                  | 4,894   | 2.43%   | 5,742               | 5.62%   |
| Total                 | 201,166 | 100.00% | 102,173             | 100.00% |

Simple repeat: 33.93%, low complexity: 10.49%, LINE/L1: 11.65%, SINE/Alu: 10.49%, LTRs: 8.72%. Highlighted in yellow:

poorly aligned, nopath traces also lacking mate pair alignments that were not used further in analysis.

Nobestpaths: too many hits, with no single best alignment

| <b>nobestpaths by strain</b> |           |         |           |         |           |         |                  |             |                     |         |
|------------------------------|-----------|---------|-----------|---------|-----------|---------|------------------|-------------|---------------------|---------|
| Strain                       | traces    |         | mates     |         | repeats   |         | average size, nt |             | traces with repeats |         |
|                              | number    | percent | number    | percent | number    | percent | trace size       | Repeat size | number              | percent |
| 129S1_SVIMJ_CRA              | 118,684   | 5.97%   | 100,335   | 84.54%  | 136,323   | 114.86% | 797.49           | 477.85      | 103,218             | 86.97%  |
| 129X1_SVJ_CRA                | 382,732   | 19.25%  | 306,824   | 80.17%  | 441,810   | 115.44% | 800.83           | 449.82      | 327,406             | 85.54%  |
| A_J_CRA                      | 866,789   | 43.60%  | 743,279   | 85.75%  | 1,012,537 | 116.81% | 803.70           | 467.93      | 757,399             | 87.38%  |
| C57BL6_J_HPGC                | 12,494    | 0.63%   | 0         | 0.00%   | 14,834    | 118.73% | 896.37           | 489.29      | 10,909              | 87.31%  |
| C57BL_6J_BCM                 | 22,442    | 1.13%   | 8,794     | 39.19%  | 25,260    | 112.56% | 900.97           | 549.88      | 19,410              | 86.49%  |
| DBA_2J_CRA                   | 585,072   | 29.43%  | 488,310   | 83.46%  | 669,858   | 114.49% | 802.03           | 506.55      | 518,372             | 88.60%  |
| total                        | 1,988,213 | 100.00% | 1,647,542 | 82.87%  | 2,300,622 | 115.71% | 833.57           | 490.22      | 1,736,714           | 87.35%  |

| <b>nobestpaths by repeat size range</b> |           |         |                     |         |
|-----------------------------------------|-----------|---------|---------------------|---------|
| repeat size range, nt                   | repeats   |         | traces with repeats |         |
|                                         | number    | percent | number              | percent |
| 0-200                                   | 722,719   | 31.41%  | 191,093             | 11.00%  |
| 201-400                                 | 291,817   | 12.68%  | 153,034             | 8.81%   |
| 401-600                                 | 184,087   | 8.00%   | 170,499             | 9.82%   |
| 601-800                                 | 735,919   | 31.99%  | 827,730             | 47.66%  |
| 801-                                    | 366,080   | 15.91%  | 394,358             | 22.71%  |
| Total                                   | 2,300,622 | 100.00% | 1,736,714           | 100.00% |

LINE/L1: 28.06%, Satellite: 21.95%, LTRs: 28.26%, Simple repeat: 9.31%

# Insertion polymorphisms in unassembled strain X

## Variant traces by strain

| strain          | traces    |         | mates     |         | repeats   |         | average size, nt |             | traces with repeats |         |
|-----------------|-----------|---------|-----------|---------|-----------|---------|------------------|-------------|---------------------|---------|
|                 | number    | percent | number    | percent | number    | percent | trace size       | repeat size | number              | percent |
| 129S1_SVIMJ_CRA | 65,828    | 2.97%   | 53,049    | 80.59%  | 92,908    | 141.14% | 806.07           | 159.21      | 50,572              | 76.82%  |
| 129X1_SVJ_CRA   | 613,820   | 27.71%  | 482,631   | 78.63%  | 731,257   | 119.13% | 808.16           | 161.66      | 430,549             | 70.14%  |
| A_J_CRA         | 1,059,161 | 47.82%  | 876,137   | 82.72%  | 1,308,666 | 123.56% | 817.79           | 163.69      | 752,184             | 71.02%  |
| C57BL6_J_HPGC   | 55,266    | 2.50%   | 0         | 0.00%   | 71,513    | 129.40% | 915.85           | 137.31      | 37,114              | 67.16%  |
| C57BL_6J_BCM    | 26,209    | 1.18%   | 9,871     | 37.66%  | 35,880    | 136.90% | 947.33           | 172.56      | 19,451              | 74.21%  |
| DBA_2J_CRA      | 394,577   | 17.81%  | 317,184   | 80.39%  | 544,222   | 137.93% | 810.69           | 161.73      | 300,563             | 76.17%  |
| Total           | 2,214,861 | 100.00% | 1,738,872 | 78.51%  | 2,784,446 | 125.72% | 850.98           | 159.36      | 1,590,433           | 71.81%  |

## Variant traces by repeat size range

| repeat size range, nt | repeats   |         | traces with repeats |         |
|-----------------------|-----------|---------|---------------------|---------|
|                       | number    | percent | number              | percent |
| 0-200                 | 2,097,387 | 75.33%  | 719,456             | 45.24%  |
| 201-400               | 405,829   | 14.57%  | 432,293             | 27.18%  |
| 401-600               | 169,000   | 6.07%   | 255,351             | 16.06%  |
| 601-800               | 103,810   | 3.73%   | 170,353             | 10.71%  |
| 801-                  | 8,420     | 0.30%   | 12,980              | 0.82%   |
| total                 | 2,784,446 | 100.00% | 1,590,433           | 100.00% |

Simple repeat: 26.87%, LINE/L1: 21.15%, low complexity: 17.28%, SINE/Alu: 8.29%, LTRs: 13.98%

L1 polymorphisms (estimated number): 16,658

Multiexons: two or more insertion/deletion variants identified by one sequence trace

| <b>multiexons by strain</b> |         |         |         |         |         |         |                  |             |                     |         |
|-----------------------------|---------|---------|---------|---------|---------|---------|------------------|-------------|---------------------|---------|
| strain                      | traces  |         | mates   |         | repeats |         | average size, nt |             | traces with repeats |         |
|                             | number  | Percent | number  | percent | number  | percent | trace size       | repeat size | number              | percent |
| 129S1_SVIMJ_CRA             | 16,381  | 6.29%   | 13,781  | 84.13%  | 20,918  | 127.70% | 808.06           | 541.07      | 15,896              | 97.04%  |
| 129X1_SVJ_CRA               | 43,549  | 16.72%  | 34,892  | 80.12%  | 61,131  | 140.37% | 812.62           | 446.54      | 41,666              | 95.68%  |
| A_J_CRA                     | 108,470 | 41.65%  | 92,611  | 85.38%  | 135,784 | 125.18% | 814.55           | 480.47      | 94,999              | 87.58%  |
| C57BL6_J_HPGC               | 1,496   | 0.57%   | 0       | 0.00%   | 2,393   | 159.96% | 1,019.26         | 152.19      | 1,144               | 76.47%  |
| C57BL_6J_BCM                | 1,029   | 0.40%   | 359     | 34.89%  | 1,857   | 180.47% | 919.12           | 220.87      | 901                 | 87.56%  |
| DBA_2J_CRA                  | 89,520  | 34.37%  | 74,187  | 82.87%  | 114,667 | 128.09% | 814.08           | 538.57      | 86,780              | 96.94%  |
| Total                       | 260,445 | 100.00% | 215,830 | 82.87%  | 336,750 | 129.30% | 864.61           | 396.62      | 241,386             | 92.68%  |

| <b>multiexons by repeat size range</b> |         |         |                     |         |
|----------------------------------------|---------|---------|---------------------|---------|
| repeat size range, nt                  | repeats |         | traces with repeats |         |
|                                        | number  | percent | number              | percent |
| 0-200                                  | 120,404 | 35.75%  | 15,569              | 6.45%   |
| 201-400                                | 22,139  | 6.57%   | 16,392              | 6.79%   |
| 401-600                                | 12,039  | 3.58%   | 15,646              | 6.48%   |
| 601-800                                | 106,049 | 31.49%  | 115,697             | 47.93%  |
| 801-                                   | 76,119  | 22.60%  | 78,082              | 32.35%  |
| Total                                  | 336,750 | 100.00% | 241,386             | 100.00% |

Satellite: 53.46%, simple repeat: 15.55%, LINE/L1: 9.06%

Supplementary Table 3. **Mouse L1 retrotransposon subfamilies in reference C57**

**genome.**

Counts of L1 families identified by RepeatMasker. Reference L1 elements were categorized as polymorphic (absent in at least one unassembled strain(s)); non-polymorphic (present in all five strains); or undetermined. Members of various L1 subfamilies were determined by RepeatMasker, except members of T<sub>F</sub>, A and G<sub>F</sub> (*yellow*) subfamilies, which were reclassified using canonical sequences and CrossMatch.

| L1 class | non-polymorphic |       | unknown |       | polymorphic |       | total reference |       |
|----------|-----------------|-------|---------|-------|-------------|-------|-----------------|-------|
|          | count           | %     | count   | %     | count       | %     | count           | %     |
| HAL1     | 624             | 0.49% | 2,654   | 0.50% | 6           | 0.09% | 3,284           | 0.49% |
| HAL1b    | 110             | 0.09% | 392     | 0.07% | 1           | 0.01% | 503             | 0.08% |
| L1_Mm    | 1,298           | 1.02% | 5,225   | 0.98% | 78          | 1.16% | 6,601           | 0.99% |
| L1_Mur1  | 1,236           | 0.97% | 4,927   | 0.93% | 38          | 0.57% | 6,201           | 0.93% |
| L1_Mur2  | 2,553           | 2.00% | 10,587  | 1.99% | 86          | 1.28% | 13,226          | 1.98% |
| L1_Mur3  | 4,363           | 3.41% | 16,928  | 3.18% | 97          | 1.44% | 21,388          | 3.21% |
| L1_Mus1  | 4,393           | 3.44% | 16,834  | 3.17% | 96          | 1.43% | 21,323          | 3.20% |
| L1_Mus2  | 2,822           | 2.21% | 10,960  | 2.06% | 64          | 0.95% | 13,846          | 2.08% |
| L1_Mus3  | 3,505           | 2.74% | 14,529  | 2.73% | 76          | 1.13% | 18,110          | 2.72% |
| L1_Mus4  | 1,713           | 1.34% | 6,704   | 1.26% | 35          | 0.52% | 8,452           | 1.27% |
| L1_Rod   | 1,718           | 1.34% | 7,115   | 1.34% | 18          | 0.27% | 8,851           | 1.33% |
| L1M      | 301             | 0.24% | 1,345   | 0.25% | 0           | 0.00% | 1,646           | 0.25% |
| L1M1     | 289             | 0.23% | 1,181   | 0.22% | 0           | 0.00% | 1,470           | 0.22% |
| L1M2     | 2,781           | 2.18% | 11,201  | 2.11% | 40          | 0.59% | 14,022          | 2.10% |
| L1M2a    | 40              | 0.03% | 135     | 0.03% | 0           | 0.00% | 175             | 0.03% |
| L1M2a1   | 0               | 0.00% | 2       | 0.00% | 0           | 0.00% | 2               | 0.00% |
| L1M2b    | 0               | 0.00% | 12      | 0.00% | 3           | 0.04% | 15              | 0.00% |
| L1M2c    | 69              | 0.05% | 228     | 0.04% | 0           | 0.00% | 297             | 0.04% |
| L1M3     | 1,252           | 0.98% | 5,427   | 1.02% | 12          | 0.18% | 6,691           | 1.00% |
| L1M3a    | 14              | 0.01% | 47      | 0.01% | 0           | 0.00% | 61              | 0.01% |
| L1M3b    | 17              | 0.01% | 64      | 0.01% | 1           | 0.01% | 82              | 0.01% |
| L1M3c    | 34              | 0.03% | 200     | 0.04% | 0           | 0.00% | 234             | 0.04% |
| L1M3d    | 15              | 0.01% | 99      | 0.02% | 0           | 0.00% | 114             | 0.02% |
| L1M3de   | 29              | 0.02% | 90      | 0.02% | 0           | 0.00% | 119             | 0.02% |
| L1M3e    | 82              | 0.06% | 340     | 0.06% | 5           | 0.07% | 427             | 0.06% |
| L1M3f    | 4               | 0.00% | 40      | 0.01% | 0           | 0.00% | 44              | 0.01% |
| L1M4     | 1,924           | 1.51% | 8,640   | 1.62% | 32          | 0.48% | 10,596          | 1.59% |
| L1M4b    | 441             | 0.35% | 1,932   | 0.36% | 3           | 0.04% | 2,376           | 0.36% |
| L1M4c    | 570             | 0.45% | 2,303   | 0.43% | 9           | 0.13% | 2,882           | 0.43% |
| L1M5     | 3,016           | 2.36% | 12,692  | 2.39% | 38          | 0.57% | 15,746          | 2.36% |
| L1MA10   | 135             | 0.11% | 603     | 0.11% | 3           | 0.04% | 741             | 0.11% |
| L1MA4    | 1,124           | 0.88% | 4,314   | 0.81% | 12          | 0.18% | 5,450           | 0.82% |
| L1MA4A   | 387             | 0.30% | 1,660   | 0.31% | 2           | 0.03% | 2,049           | 0.31% |
| L1MA5    | 764             | 0.60% | 3,047   | 0.57% | 8           | 0.12% | 3,819           | 0.57% |

|         |       |       |        |       |       |        |        |       |
|---------|-------|-------|--------|-------|-------|--------|--------|-------|
| L1MA5A  | 205   | 0.16% | 720    | 0.14% | 6     | 0.09%  | 931    | 0.14% |
| L1MA6   | 1,100 | 0.86% | 4,512  | 0.85% | 19    | 0.28%  | 5,631  | 0.85% |
| L1MA7   | 525   | 0.41% | 2,008  | 0.38% | 6     | 0.09%  | 2,539  | 0.38% |
| L1MA8   | 663   | 0.52% | 2,469  | 0.46% | 8     | 0.12%  | 3,140  | 0.47% |
| L1MA9   | 723   | 0.57% | 2,850  | 0.54% | 8     | 0.12%  | 3,581  | 0.54% |
| L1MB1   | 394   | 0.31% | 1,503  | 0.28% | 3     | 0.04%  | 1,900  | 0.29% |
| L1MB2   | 450   | 0.35% | 1,794  | 0.34% | 9     | 0.13%  | 2,253  | 0.34% |
| L1MB3   | 912   | 0.71% | 3,251  | 0.61% | 14    | 0.21%  | 4,177  | 0.63% |
| L1MB4   | 403   | 0.32% | 1,784  | 0.34% | 8     | 0.12%  | 2,195  | 0.33% |
| L1MB5   | 581   | 0.45% | 2,280  | 0.43% | 3     | 0.04%  | 2,864  | 0.43% |
| L1MB7   | 1,148 | 0.90% | 4,309  | 0.81% | 12    | 0.18%  | 5,469  | 0.82% |
| L1MB8   | 970   | 0.76% | 3,698  | 0.70% | 23    | 0.34%  | 4,691  | 0.70% |
| L1MC    | 1,176 | 0.92% | 4,723  | 0.89% | 21    | 0.31%  | 5,920  | 0.89% |
| L1MC1   | 1,034 | 0.81% | 3,502  | 0.66% | 10    | 0.15%  | 4,546  | 0.68% |
| L1MC2   | 380   | 0.30% | 1,405  | 0.26% | 9     | 0.13%  | 1,794  | 0.27% |
| L1MC3   | 931   | 0.73% | 3,539  | 0.67% | 6     | 0.09%  | 4,476  | 0.67% |
| L1MC4   | 835   | 0.65% | 3,256  | 0.61% | 9     | 0.13%  | 4,100  | 0.62% |
| L1MC4_3 | 144   | 0.11% | 580    | 0.11% | 1     | 0.01%  | 725    | 0.11% |
| L1MC4a  | 506   | 0.40% | 2,089  | 0.39% | 4     | 0.06%  | 2,599  | 0.39% |
| L1MC5   | 392   | 0.31% | 1,757  | 0.33% | 3     | 0.04%  | 2,152  | 0.32% |
| L1MCa   | 608   | 0.48% | 2,446  | 0.46% | 12    | 0.18%  | 3,066  | 0.46% |
| L1MCb   | 135   | 0.11% | 561    | 0.11% | 4     | 0.06%  | 700    | 0.11% |
| L1MCc   | 95    | 0.07% | 473    | 0.09% | 2     | 0.03%  | 570    | 0.09% |
| L1MD    | 1,002 | 0.78% | 4,715  | 0.89% | 13    | 0.19%  | 5,730  | 0.86% |
| L1Md_A  | 1,292 | 1.01% | 9,298  | 1.75% | 1,570 | 23.35% | 12,160 | 1.82% |
| L1Md_F  | 901   | 0.70% | 4,308  | 0.81% | 75    | 1.12%  | 5,284  | 0.79% |
| L1Md_F2 | 6,899 | 5.40% | 37,535 | 7.06% | 531   | 7.90%  | 44,965 | 6.75% |
| L1Md_F3 | 1,376 | 1.08% | 9,207  | 1.73% | 133   | 1.98%  | 10,716 | 1.61% |
| L1Md_GF | 330   | 0.26% | 3,116  | 0.59% | 535   | 7.96%  | 3,981  | 0.60% |
| L1Md_TF | 840   | 0.66% | 7,589  | 1.43% | 1,869 | 27.80% | 10,298 | 1.55% |
| L1MD1   | 400   | 0.31% | 1,495  | 0.28% | 1     | 0.01%  | 1,896  | 0.28% |
| L1MD2   | 479   | 0.37% | 2,044  | 0.38% | 2     | 0.03%  | 2,525  | 0.38% |
| L1MD3   | 448   | 0.35% | 2,008  | 0.38% | 5     | 0.07%  | 2,461  | 0.37% |
| L1MDa   | 606   | 0.47% | 2,827  | 0.53% | 8     | 0.12%  | 3,441  | 0.52% |
| L1MDb   | 110   | 0.09% | 519    | 0.10% | 2     | 0.03%  | 631    | 0.09% |
| L1ME1   | 870   | 0.68% | 3,267  | 0.61% | 8     | 0.12%  | 4,145  | 0.62% |
| L1ME2   | 563   | 0.44% | 2,037  | 0.38% | 5     | 0.07%  | 2,605  | 0.39% |
| L1ME3   | 209   | 0.16% | 846    | 0.16% | 1     | 0.01%  | 1,056  | 0.16% |
| L1ME3A  | 342   | 0.27% | 1,426  | 0.27% | 5     | 0.07%  | 1,773  | 0.27% |
| L1ME3B  | 265   | 0.21% | 1,026  | 0.19% | 5     | 0.07%  | 1,296  | 0.19% |
| L1ME4a  | 259   | 0.20% | 1,097  | 0.21% | 0     | 0.00%  | 1,356  | 0.20% |
| L1MEa   | 50    | 0.04% | 195    | 0.04% | 0     | 0.00%  | 245    | 0.04% |
| L1MEb   | 119   | 0.09% | 459    | 0.09% | 2     | 0.03%  | 580    | 0.09% |
| L1MEc   | 1,067 | 0.83% | 4,063  | 0.76% | 5     | 0.07%  | 5,135  | 0.77% |
| L1MED   | 198   | 0.15% | 825    | 0.16% | 0     | 0.00%  | 1,023  | 0.15% |
| L1MEe   | 236   | 0.18% | 1,175  | 0.22% | 3     | 0.04%  | 1,414  | 0.21% |



|         |         |         |         |         |       |         |         |         |
|---------|---------|---------|---------|---------|-------|---------|---------|---------|
| L1P5    | 40      | 0.03%   | 211     | 0.04%   | 0     | 0.00%   | 251     | 0.04%   |
| L1PB4   | 27      | 0.02%   | 125     | 0.02%   | 0     | 0.00%   | 152     | 0.02%   |
| L1VL1   | 437     | 0.34%   | 1,986   | 0.37%   | 13    | 0.19%   | 2,436   | 0.37%   |
| L1VL2   | 623     | 0.49%   | 2,362   | 0.44%   | 19    | 0.28%   | 3,004   | 0.45%   |
| L1VL4   | 886     | 0.69%   | 2,873   | 0.54%   | 14    | 0.21%   | 3,773   | 0.57%   |
| Lx      | 3,874   | 3.03%   | 15,544  | 2.92%   | 75    | 1.12%   | 19,493  | 2.93%   |
| Lx2     | 2,669   | 2.09%   | 10,585  | 1.99%   | 54    | 0.80%   | 13,308  | 2.00%   |
| Lx2A    | 177     | 0.14%   | 844     | 0.16%   | 1     | 0.01%   | 1,022   | 0.15%   |
| Lx2A1   | 409     | 0.32%   | 1,794   | 0.34%   | 4     | 0.06%   | 2,207   | 0.33%   |
| Lx2B    | 2,044   | 1.60%   | 8,058   | 1.52%   | 44    | 0.65%   | 10,146  | 1.52%   |
| Lx3_Mus | 1,605   | 1.26%   | 6,890   | 1.30%   | 42    | 0.62%   | 8,537   | 1.28%   |
| Lx3A    | 1,123   | 0.88%   | 4,840   | 0.91%   | 19    | 0.28%   | 5,982   | 0.90%   |
| Lx3B    | 837     | 0.65%   | 3,683   | 0.69%   | 19    | 0.28%   | 4,539   | 0.68%   |
| Lx3C    | 1,353   | 1.06%   | 5,173   | 0.97%   | 24    | 0.36%   | 6,550   | 0.98%   |
| Lx4A    | 1,742   | 1.36%   | 6,732   | 1.27%   | 28    | 0.42%   | 8,502   | 1.28%   |
| Lx4B    | 1,684   | 1.32%   | 6,943   | 1.31%   | 23    | 0.34%   | 8,650   | 1.30%   |
| Lx5     | 4,880   | 3.82%   | 17,778  | 3.34%   | 83    | 1.23%   | 22,741  | 3.41%   |
| Lx6     | 4,676   | 3.66%   | 18,661  | 3.51%   | 80    | 1.19%   | 23,417  | 3.51%   |
| Lx7     | 6,392   | 5.00%   | 25,359  | 4.77%   | 122   | 1.81%   | 31,873  | 4.78%   |
| Lx8     | 11,614  | 9.09%   | 42,969  | 8.08%   | 161   | 2.39%   | 54,744  | 8.22%   |
| Lx9     | 9,019   | 7.06%   | 35,864  | 6.74%   | 135   | 2.01%   | 45,018  | 6.76%   |
| MusHAL1 | 873     | 0.68%   | 3,348   | 0.63%   | 22    | 0.33%   | 4,243   | 0.64%   |
| N/D     | 25      | 0.02%   | 137     | 0.03%   | 0     | 0.00%   | 162     | 0.02%   |
| total   | 127,803 | 100.00% | 531,802 | 100.00% | 6,723 | 100.00% | 666,328 | 100.00% |

### (b) Reclassification of young L1s in the reference C57 genome.

| L1 class       | RepeatMasker<br>default output | After Cross_match<br>re-classification |
|----------------|--------------------------------|----------------------------------------|
| A              | 16,656                         | 12,160                                 |
| T <sub>F</sub> | 18,211                         | 10,298                                 |
| G <sub>F</sub> | 2,913                          | 3,981                                  |
| Total          | 37,780                         | 26,439                                 |

### (c) Predicted and observed numbers of full-length and active young mouse L1s.

| L1 class       | # predicted FL L1s                            | # predicted active<br>L1s                    | # reference<br>genome FL L1s |
|----------------|-----------------------------------------------|----------------------------------------------|------------------------------|
| A              | 6,500(Saxton and<br>Martin 1998)              | 900(Goodier et al.<br>2001)                  | 3,514                        |
| T <sub>F</sub> | 3,000 –<br>4,800(DeBerardinis<br>et al. 1998) | 1,800-<br>3,000(DeBerardinis<br>et al. 1998) | 3,438                        |
| G <sub>F</sub> | 1,500(Goodier et al.<br>2001)                 | 400(Goodier et al.<br>2001)                  | 704                          |

The number of full-length (FL) L1 elements in the reference C57 genome is defined by a length > 5,000 nt and the presence of at least one 5' UTR monomer.

Supplementary Table 4. **Pairwise comparison of polymorphic L1s in unassembled strains.**

|                    |          | <b>129S1/SVIMJ</b> |          | <b>129X1/SVJ</b> |          | <b>A/J</b> |          | <b>DBA/2J</b> |          |
|--------------------|----------|--------------------|----------|------------------|----------|------------|----------|---------------|----------|
|                    |          | <b>A</b>           | <b>P</b> | <b>A</b>         | <b>P</b> | <b>A</b>   | <b>P</b> | <b>A</b>      | <b>P</b> |
| <b>129S1/SVIMJ</b> | <b>A</b> | 550                | 0        | 422              | 128      | 232        | 318      | 234           | 316      |
|                    |          | 29.6%              | 0.0%     | 22.7%            | 6.9%     | 12.5%      | 17.1%    | 12.6%         | 17.0%    |
|                    | <b>P</b> | 0                  | 1311     | 141              | 1170     | 767        | 544      | 737           | 574      |
|                    |          | 0.0%               | 70.4%    | 7.6%             | 62.9%    | 41.2%      | 29.2%    | 39.6%         | 30.8%    |
| <b>129X1/SVJ</b>   | <b>A</b> |                    |          | 563              | 0        | 233        | 330      | 230           | 333      |
|                    |          |                    |          | 30.3%            | 0.0%     | 12.5%      | 17.7%    | 12.4%         | 17.9%    |
|                    | <b>P</b> |                    |          | 0                | 1298     | 766        | 532      | 741           | 557      |
|                    |          |                    |          | 0.0%             | 69.7%    | 41.2%      | 28.6%    | 39.8%         | 29.9%    |
| <b>A/J</b>         | <b>A</b> |                    |          |                  |          | 999        | 0        | 422           | 577      |
|                    |          |                    |          |                  |          | 53.7%      | 0.0%     | 22.7%         | 31.0%    |
|                    | <b>P</b> |                    |          |                  |          | 0          | 862      | 549           | 313      |
|                    |          |                    |          |                  |          | 0.0%       | 46.3%    | 29.5%         | 16.8%    |
| <b>DBA/2J</b>      | <b>A</b> |                    |          |                  |          |            |          | 971           | 0        |
|                    |          |                    |          |                  |          |            |          | 52.2%         | 0.0%     |
|                    | <b>P</b> |                    |          |                  |          |            |          | 0             | 890      |
|                    |          |                    |          |                  |          |            |          | 0.0%          | 47.8%    |

The absence or presence (A/P) status of L1 polymorphisms was counted only when known for all five strains. Each element must be present in the C57 reference genome and absent from at least one of the four unassembled strains.

Supplementary Table 5. **Validation of selected polymorphisms in mouse strains and subspecies – additional information.** The data are arranged in the same layout as Table 2. Note that A/J “weakvariant” trace 1045646480 and its mate 1045646822 align to chr. 14: ~ 39450000, as do 1018921985 and mate 1018922407.

| traceid    | L1 name in reference database;<br>Genbank accession nos. | length | absent from strains as per mm8<br>reference | No.<br>sup | rel<br>orient | full gene name                                       |
|------------|----------------------------------------------------------|--------|---------------------------------------------|------------|---------------|------------------------------------------------------|
| 1042722486 | 1_5810074_L1Md_A                                         | 5,605  | DBA2J                                       | 2          |               |                                                      |
| Rd7donorL1 | 4_21741132_L1Md_T                                        | 7,243  | 129X1, AJ, DBA2J                            | 4          |               |                                                      |
| 1090553782 | 10_10513926_L1Md_A                                       | 979    | DBA2J                                       | 3          | AS            | Metabotropic glutamate receptor 1 precursor (mGluR1) |
| 1091069131 | 10_10520620_L1Md_F2                                      | 487    | DBA2J                                       | 2          | sense         | Metabotropic glutamate receptor 1 precursor (mGluR1) |
| 1100631474 | 10_13352437_L1Md_T                                       | 881    | DBA2J                                       | 3          | sense         | androgen-induced 1                                   |
| 1097537874 | 10_13602567_L1Md_A                                       | 1,082  | none                                        | 2          |               |                                                      |
| 1097610660 | 10_13964068_L1Md_F3                                      | 551    | DBA2J                                       | 3          |               |                                                      |
| 1098874361 | 10_102162706_L1Md_T                                      | 452    | DBA2J                                       | 2          |               |                                                      |
| 1099621093 | 10_102279770_L1Md_T                                      | 380    | AJ, DBA2J                                   | 5          |               |                                                      |
| 1035280108 | 10_102320921_L1Md_T                                      | 1,072  | 129X1, AJ                                   | 7          |               |                                                      |
| 1083301601 | 10_105033229_L1Md_A                                      | 829    | AJ, DBA2J                                   | 3          |               |                                                      |
| 1043213053 | 10_107383036_L1Md_A                                      | 2,280  | AJ                                          | 3          |               |                                                      |
| 1047671029 | 10_110582693_L1Md_A                                      | 567    | DBA2J                                       | 1          | AS            | oxysterol-binding protein-like protein 8 isoform     |
| 1038614451 | 11_14815876_L1Md_T                                       | 6,275  | 129S1,129X1,AJ,DBA2J                        | 6          |               |                                                      |
| 1030700574 | 12_35318651_L1Md_T                                       | 6,519  | 129S1,129X1,A/J,DBA/2J                      | 8          | AS            | histone deacetylase 9                                |
| 1019767717 | 13_92202618_L1Md_A                                       | 7,053  | AJ, DBA/2J                                  | 3          | AS            | AK048302                                             |
| 1042769406 | 14_39455316_L1Md_T                                       | 7,584  | DBA/2J                                      | 2          | AS            |                                                      |
| 1083543712 | 15_20476076_L1Md_A                                       | 6,421  | 129S1, 129X1, A/J                           | 3          | AS            |                                                      |
| 1072826857 | 16_59113811_L1Md_T                                       | 7,095  | 129S1, 129X1                                | 4          |               |                                                      |
| 1018878835 | 17_39025598_L1Md_T                                       | 5,835  | A/J                                         | 2          |               |                                                      |
| 1030552568 | 18_19954996_L1Md_A                                       | 6,194  | 129S1, DBA/2J                               | 4          |               |                                                      |
| 1097301560 | 19_13837558_L1Md_T                                       | 6,676  | DBA/2J                                      | 2          |               |                                                      |
| 4ASIII2_1  | ND; EF591881                                             |        | C57BL/6J; expect insertion trace(s)         |            |               |                                                      |
| 8AS1_1     | ND; EF591882                                             |        | C57BL/6J; expect insertion trace(s)         |            |               | poly (ADP-ribose) polymerase family, member 8        |
| 11ASIII    | ND; EF591883                                             |        | C57BL/6J; expect insertion trace(s)         |            |               | Drosha, RNaseIII                                     |
| 1ASIII     | ND; EF591880                                             |        | C57BL/6J; expect insertion trace(s)         |            |               |                                                      |
| 7ASIII4_2  | 2_43990002_L1Md_T                                        | 6,648  | 129X1, A/J                                  | 4          | AS            | Rho GTPase activating protein 15 isoform 1           |
| 9AS1_1     | 16_95119881_L1Md_T                                       | 6,209  | none                                        |            |               |                                                      |
| 5ASII      | 2_66106851_L1Md_F2                                       | 6,362  | none; non-polymorphic                       |            | AS            | sodium channel 3                                     |
| 7ASIII2_1A | 12_78323702_L1Md_T                                       | 6,439  | none; non-polymorphic                       |            | AS            | fucosyltransferase 8                                 |
| 7ASIII2_1B | 12_78302247_L1Md_T                                       | 6,269  | none; non-polymorphic                       |            | AS            | fucosyltransferase 8                                 |

Supplementary Table 6. **Structural features of L1 polymorphisms.**

a) **Young, active L1 retrotransposons by length and presence in strains.**

|                                            |                        | <b>L1 subfamily</b>        |                      |                      | <b>young L1 subfamilies</b> |
|--------------------------------------------|------------------------|----------------------------|----------------------|----------------------|-----------------------------|
| <b>presence in 5 strains</b>               |                        | <b>A</b>                   | <b>G<sub>F</sub></b> | <b>T<sub>F</sub></b> |                             |
| <b>non-polymorphic</b>                     | full-length            | 471                        | 48                   | 222                  | 741                         |
|                                            | N                      | 1,292                      | 330                  | 840                  | 2,462                       |
|                                            | percent                | 36.46%                     | 14.55%               | 26.43%               | 30.10%                      |
| <b>undetermined</b>                        | full-length            | 2,838                      | 567                  | 2,499                | 5,904                       |
|                                            | N                      | 9,298                      | 3,116                | 7,589                | 20,003                      |
|                                            | percent                | 30.52%                     | 18.20%               | 32.93%               | 29.52%                      |
| <b>polymorphic (insert in C57)</b>         | full-length            | 651                        | 124                  | 939                  | 1,714                       |
|                                            | N                      | 1,570                      | 535                  | 1,869                | 3,974                       |
|                                            | percent                | 41.46%                     | 23.18%               | 50.24%               | 43.13%                      |
| <b>total</b>                               | full-length            | 3,960                      | 739                  | 3,660                | 8,359                       |
|                                            | N                      | 12,160                     | 3,981                | 10,298               | 26,439                      |
|                                            | percent                | 32.57%                     | 18.56%               | 35.54%               | 31.62%                      |
| <b>polymorphic vs. non-polymorphic L1s</b> | significance (p-value) | 4.99E-0.006310.0021.30E-25 |                      |                      |                             |

The number and percentage of full-length vs. total (any length) L1 elements comprising each young active subfamily (L1 A, T<sub>F</sub> and G<sub>F</sub>) are indicated for non-polymorphic, polymorphic and unknown categories. For members of young, active L1 subfamilies, L1 polymorphisms are significantly more full-length than are non-polymorphic L1s. The p-values were calculated by chi square tests.

## b) TSDs and poly(A) tails in L1 subfamilies.

| presence in 5 strains               | TSD type             |          | L1 subfamily |                |                |         |
|-------------------------------------|----------------------|----------|--------------|----------------|----------------|---------|
|                                     |                      |          | A            | G <sub>F</sub> | T <sub>F</sub> | all L1s |
| non-polymorphic                     | non-TSD              | count    | 369          | 132            | 223            | 84,282  |
|                                     |                      | percent  | 28.56%       | 40.00%         | 26.55%         | 65.95%  |
|                                     | TSD-only             | count    | 657          | 147            | 409            | 36,385  |
|                                     |                      | percent  | 50.85%       | 44.55%         | 48.69%         | 28.47%  |
|                                     | TSD and poly(A) tail | count    | 266          | 51             | 208            | 7,136   |
|                                     |                      | percent  | 20.59%       | 15.45%         | 24.76%         | 5.58%   |
|                                     | total                | count    | 1,292        | 330            | 840            | 127,803 |
| undetermined                        | non-TSD              | count    | 2,654        | 1,211          | 2,053          | 344,123 |
|                                     |                      | percent  | 28.54%       | 38.86%         | 27.05%         | 64.73%  |
|                                     | TSD-only             | count    | 4,829        | 1,422          | 3,688          | 154,391 |
|                                     |                      | percent  | 51.94%       | 45.64%         | 48.60%         | 29.04%  |
|                                     | poly(A)-tailed TSD   | count    | 1,815        | 483            | 1,848          | 33,288  |
|                                     |                      | percent  | 19.52%       | 15.50%         | 24.35%         | 6.26%   |
|                                     | total                | count    | 9,298        | 3,116          | 7,589          | 531,602 |
| polymorphic<br>(insertion in C57)   | non-TSD              | count    | 261          | 138            | 300            | 2,268   |
|                                     |                      | percent  | 16.62%       | 25.79%         | 16.05%         | 33.73%  |
|                                     | TSD-only             | count    | 903          | 272            | 955            | 3,082   |
|                                     |                      | percent  | 57.52%       | 50.84%         | 51.10%         | 45.84%  |
|                                     | poly(A)-tailed TSD   | count    | 406          | 125            | 614            | 1,373   |
|                                     |                      | percent  | 25.86%       | 23.36%         | 32.85%         | 20.42%  |
|                                     | total                | count    | 1,570        | 535            | 1,869          | 6,723   |
| total                               | non-TSD              | count    | 3,284        | 1,481          | 2,576          | 430,673 |
|                                     |                      | percent  | 27.01%       | 37.20%         | 25.01%         | 64.63%  |
|                                     | TSD-only             | count    | 6,389        | 1,841          | 5,052          | 193,858 |
|                                     |                      | percent  | 52.54%       | 46.24%         | 49.06%         | 29.09%  |
|                                     | poly(A)-tailed TSD   | count    | 2,487        | 659            | 2,670          | 41,797  |
|                                     |                      | percent  | 20.45%       | 16.55%         | 25.93%         | 6.27%   |
|                                     | total                | count    | 12,160       | 3,981          | 10,298         | 666,328 |
| polymorphic vs. non-polymorphic L1s |                      | p-values | 7.38E-12     | 2.94E-05       | 3.11E-11       | 0.000   |

The presence of TSDs and poly(A) tails adjacent to L1 T<sub>F</sub>, A, and G<sub>F</sub> integrants is indicated for non-polymorphic, non-polymorphic and unknown categories. Members of each of the young active L1 subfamilies are significantly more likely to have both TSDs and poly(A) tails than to lack them. Significance values of chi-square tests were computed for 2x2 tables. The test compared the frequencies of L1 without TSD to the frequencies of L1 with poly(A)-tailed TSD in two groups: polymorphic L1s and non-polymorphic L1s (highlighted in yellow).

c) Poly(A) tail lengths in young, active L1 subfamilies.

| poly(A) tail length                        |                        | L1 subfamily members with poly(A) tails |                |                |          |
|--------------------------------------------|------------------------|-----------------------------------------|----------------|----------------|----------|
| L1 integrant status in 5 strains           |                        | A                                       | G <sub>F</sub> | T <sub>F</sub> | all L1s  |
| <b>non-polymorphic</b>                     | mean                   | 18.91                                   | 18.61          | 19.54          | 18.72    |
|                                            | std. dev.              | 8.495                                   | 7.571          | 8.567          | 10.985   |
|                                            | N                      | 266                                     | 51             | 208            | 7,136    |
| <b>undetermined</b>                        | mean                   | 19.86                                   | 20.61          | 20.51          | 19.61    |
|                                            | std. dev.              | 0.551                                   | 10.965         | 10.715         | 11.895   |
|                                            | N                      | 1,815                                   | 483            | 1,848          | 33,288   |
| <b>polymorphic (insertion in C57)</b>      | mean                   | 20.39                                   | 21.50          | 21.54          | 21.02    |
|                                            | std. dev.              | 8.810                                   | 11.175         | 11.451         | 10.588   |
|                                            | N                      | 406                                     | 125            | 614            | 1,373    |
| <b>total</b>                               | mean                   | 19.84                                   | 20.62          | 20.67          | 19.51    |
|                                            | std. dev.              | 9.330                                   | 10.790         | 10.749         | 11.711   |
|                                            | N                      | 2,487                                   | 659            | 2,670          | 41,797   |
| t-test                                     |                        | A                                       | G <sub>F</sub> | T <sub>F</sub> | all L1s  |
| <b>polymorphic vs. non-polymorphic L1s</b> | significance (p-value) | 0.031                                   | 0.049          | 0.008          | 9.94E-13 |

The lengths of poly(A) tails at the 3' end of L1 T<sub>F</sub>, A, and G<sub>F</sub> elements are indicated for non-polymorphic, polymorphic and unknown categories. A two-sided t-test was performed to compare significance of difference between polymorphic vs. non-polymorphic L1s (yellow).

d) Nucleotide substitution rates in L1 subfamilies.

|                                     |                        | substitution rate |                |                |         |
|-------------------------------------|------------------------|-------------------|----------------|----------------|---------|
|                                     |                        | L1 subfamily      |                |                |         |
| L1 integrant status in 5 strains    |                        | A                 | G <sub>F</sub> | T <sub>F</sub> | all L1s |
| non-polymorphic                     | mean (%)               | 3.62              | 6.58           | 3.75           | 20.98   |
|                                     | std. dev.              | 4.207             | 3.787          | 2.112          | 9.163   |
|                                     | N                      | 1,292             | 330            | 840            | 127,803 |
| undetermined                        | mean (%)               | 3.43              | 5.77           | 3.50           | 20.19   |
|                                     | std. dev.              | 3.702             | 3.118          | 1.928          | 9.492   |
|                                     | N                      | 9,298             | 3,116          | 7,589          | 531,802 |
| polymorphic (insertion in C57)      | mean (%)               | 1.45              | 5.08           | 2.76           | 8.41    |
|                                     | std. dev.              | 1.635             | 1.748          | 1.386          | 9.593   |
|                                     | N                      | 1,570             | 535            | 1,869          | 6,723   |
| total                               | mean (%)               | 3.20              | 5.74           | 3.39           | 20.22   |
|                                     | std. dev.              | 3.627             | 3.053          | 1.882          | 9.511   |
|                                     | N                      | 12,160            | 3,981          | 10,298         | 666,328 |
| t-test                              |                        | A                 | G <sub>F</sub> | T <sub>F</sub> | all L1s |
| polymorphic vs. non-polymorphic L1s | significance (p-value) | 3.23E-63          | 4.50E-11       | 1.24E-33       | 0.00    |

Substitution rates as a function of L1 class and polymorphism are shown. Polymorphic L1 members of young, active subfamilies are significantly more likely to have decreased nucleotide substitution (when aligned to consensus subfamily elements) compared to non-polymorphic or undetermined L1s. A two-sided t-test was performed to compared significance of difference between polymorphic vs. non-polymorphic L1s (yellow).

Supplementary Table 7. **Gene orientation and GC content near L1 retrotransposons.**

| L1 integrant status in 5 strains |             | non-polymorphic |         | unknown |         | polymorphic |         | total   |         |
|----------------------------------|-------------|-----------------|---------|---------|---------|-------------|---------|---------|---------|
| target type                      | orientation | count           | percent | count   | percent | count       | percent | count   | percent |
| no gene                          | NA          | 59,977          | 46.93%  | 251,197 | 47.24%  | 3,358       | 49.95%  | 314,532 | 47.20%  |
| Inside                           | antisense   | 17,899          | 68.12%  | 71,093  | 66.86%  | 785         | 58.11%  | 89,777  | 67.02%  |
|                                  | sense       | 8,377           | 31.88%  | 35,243  | 33.14%  | 566         | 41.89%  | 44,186  | 32.98%  |
|                                  | total       | 26,276          | 20.56%  | 106,336 | 20.00%  | 1,351       | 20.10%  | 133,963 | 20.10%  |
| 3'                               | antisense   | 10,166          | 52.26%  | 42,263  | 52.09%  | 523         | 55.05%  | 52,952  | 52.15%  |
|                                  | sense       | 9,285           | 47.74%  | 38,879  | 47.91%  | 427         | 44.95%  | 48,591  | 47.85%  |
|                                  | total       | 19,451          | 15.22%  | 81,142  | 15.26%  | 950         | 14.13%  | 101,543 | 15.24%  |
| 5'                               | antisense   | 10,882          | 49.24%  | 45,986  | 49.38%  | 500         | 46.99%  | 57,368  | 49.33%  |
|                                  | sense       | 11,217          | 50.76%  | 47,141  | 50.62%  | 564         | 53.01%  | 58,922  | 50.67%  |
|                                  | total       | 22,099          | 17.29%  | 93,127  | 17.51%  | 1,064       | 15.83%  | 116,290 | 17.45%  |
| Total                            |             | 127,803         | 100.00% | 531,802 | 100.00% | 6,723       | 100.00% | 666,328 | 100.00% |
| percent GC content               |             | 39.81           |         |         |         | 39.68       |         |         |         |



Supplementary Table 8. **Primary sequences and NCBI GenBank accession numbers for fusion L1-gene transcripts and polymorphic L1 integrant loci.** Internal L1 sequences have not been determined fully and are estimated by the size of spanning PCR amplicons.

| <u>Clone ID</u>     | <u>GenBank accession no.</u> | <u>Gene name</u>       |
|---------------------|------------------------------|------------------------|
| 7ASIII4-2           | EF591871                     | <i>Arghap15</i>        |
| 5ASII               | EF591872                     | <i>Scn1a</i>           |
| 1ASII-1             | EF591873                     | previously unannotated |
| 7ASIII2-1B          | EF591874                     | <i>Fut8</i>            |
| 7ASIII2-1A          | EF591875                     | <i>Fut8</i>            |
| 4ASIII2-1           | EF591876                     | AK129128               |
| 8AS1-1              | EF591877                     | <i>Parp8</i>           |
| 11ASII-1            | EF591878                     | <i>Drosha (Rnasen)</i> |
| 9AS1-1              | EF591879                     | previously unannotated |
| 1ASII-1int          | EF591880                     | previously unannotated |
| 4ASIII2-1/4ASI-1int | EF591881                     | AK129128               |
| 8AS1-1int           | EF591882                     | <i>Parp8</i>           |
| 11ASII-1/2ASII-1int | EF591883                     | <i>Drosha (Rnasen)</i> |

Supplementary Table 9. **Variable expression of fusion transcripts from full-length, polymorphic, AS L1s in reference genes.**

| chr coordinates           | strains | 129S1 | 129X1 | A/J | DBA/2J | GenBank acc. | gene name     | L1 subfamily   | location in gene | dist to exon |
|---------------------------|---------|-------|-------|-----|--------|--------------|---------------|----------------|------------------|--------------|
| chr1:8678199-8685197      | 1       | 0     | 0     | 1   | 0      | NM_027671    | Sntg1         | A              | intron6          | 6236         |
| chr1:9048084-9054491      | 2       | 0     | 2     | 1   | 0      | NM_027671    | Sntg1         | T <sub>F</sub> | intron2          | 58901        |
| chr1:9165332-9171910      | 2       | 0     | 2     | 2   | 0      | NM_027671    | Sntg1         | A              | intron2          | 21202        |
| chr1:11699606-11705927    | 1       | 0     | 0     | 1   | 0      | NM_177173    | A830018L16Rik | T <sub>F</sub> | intron7          | 27251        |
| chr1:11708434-11715071    | 2       | 1     | 0     | 1   | 0      | NM_177173    | A830018L16Rik | A              | intron7          | 18107        |
| chr1:11762011-11768993    | 3       | 0     | 2     | 1   | 1      | NM_177173    | A830018L16Rik | T <sub>F</sub> | intron8          | 14701        |
| chr1:20417355-20424773    | 1       | 0     | 0     | 1   | 0      | NM_153179    | Pkhd1         | T <sub>F</sub> | intron36         | 10598        |
| chr1:20559648-20566214    | 1       | 0     | 0     | 2   | 0      | NM_153179    | Pkhd1         | A              | intron11         | 2996         |
| chr1:24450608-24457191    | 1       | 0     | 0     | 0   | 1      | NM_007733    | Col19a1       | A              | intron11         | 5267         |
| chr1:25535375-25541866    | 2       | 0     | 0     | 1   | 1      | NM_175642    | Bai3          | T <sub>F</sub> | intron2          | 30964        |
| chr1:25606603-25613866    | 1       | 0     | 1     | 0   | 0      | NM_175642    | Bai3          | T <sub>F</sub> | intron2          | 102192       |
| chr1:32316912-32323281    | 1       | 0     | 0     | 1   | 0      | NM_133235    | Khdrbs2       | A              | intron3          | 36135        |
| chr1:44546645-44553802    | 3       | 0     | 2     | 2   | 2      | NM_027506    | Gulp1         | A              | intron1          | 50227        |
| chr1:66204276-66210957    | 3       | 0     | 1     | 3   | 2      | NM_001039934 | Mtap2         | G <sub>F</sub> | intron3          | 19356        |
| chr1:106790167-106797160  | 2       | 0     | 2     | 2   | 0      | NM_011800    | Cdh20         | A              | intron7          | 1207         |
| chr1:107395580-107401974  | 1       | 0     | 0     | 4   | 0      | NM_013784    | Pign          | T <sub>F</sub> | intron22         | 1783         |
| chr1:128619754-128625904  | 3       | 0     | 2     | 1   | 1      | NM_176957    | D130011D22Rik | T <sub>F</sub> | intron1          | 31958        |
| chr1:148366273-148372566  | 1       | 0     | 0     | 0   | 1      | NM_153539    | B830045N13Rik | T <sub>F</sub> | intron2          | 72227        |
| chr1:162257998-162264984  | 1       | 0     | 0     | 0   | 1      | NM_013862    | Rabgap1l      | A              | Intron17         | 13515        |
| chr1:163900252-163906855  | 1       | 0     | 0     | 0   | 1      | NM_001038619 | Dnm3          | T <sub>F</sub> | intron17         | 5596         |
| chr1:164175158-164182062  | 1       | 0     | 0     | 1   | 0      | NM_001038619 | Dnm3          | G <sub>F</sub> | intron4          | 8132         |
| chr1:175669610-175676103  | 1       | 0     | 1     | 0   | 0      | NM_008329    | Ifi204        | T <sub>F</sub> | intron3          | 66708        |
| chr1:176544520-176550723  | 3       | 0     | 2     | 2   | 2      | NM_019445    | Fmn2          | A              | intron14         | 5796         |
| chr1:178729985-178736580  | 2       | 0     | 2     | 1   | 0      | NM_029756    | Sdccag8       | A              | intron12         | 15204        |
| chr1:188763441-188770121  | 1       | 0     | 0     | 1   | 0      | NM_028848    | Spata17       | T <sub>F</sub> | intron9          | 14164        |
| chr1:190036535-190043492  | 2       | 0     | 1     | 0   | 3      | NM_021408    | Ush2a         | G <sub>F</sub> | intron3          | 8332         |
| chr10:10645980-10652380   | 3       | 0     | 1     | 2   | 1      | NM_016976    | Grm1          | T <sub>F</sub> | intron2          | 19212        |
| chr10:10665554-10672065   | 2       | 1     | 0     | 1   | 0      | NM_016976    | Grm1          | T <sub>F</sub> | intron2          | 38786        |
| chr10:26944089-26953707   | 1       | 0     | 0     | 1   | 0      | NM_008481    | Lama2         | T <sub>F</sub> | intron14         | 626          |
| chr10:42063175-42070425   | 1       | 0     | 1     | 0   | 0      | NM_145743    | Lace1         | A              | intron7          | 14513        |
| chr10:48914197-48919077   | 1       | 0     | 1     | 0   | 0      | NM_010349    | Grik2         | T <sub>F</sub> | intron13         | 9916         |
| chr10:113939581-113946592 | 2       | 1     | 0     | 0   | 1      | NM_146241    | Trhde         | T <sub>F</sub> | intron6          | 17275        |
| chr10:122893619-122900243 | 2       | 0     | 0     | 1   | 1      | NM_182807    | Al851790      | A              | intron2          | 59636        |
| chr11:26361459-26367854   | 2       | 0     | 0     | 1   | 2      | NM_025923    | Fanc1         | A              | intron8          | 480          |
| chr11:36185856-36192275   | 2       | 0     | 0     | 1   | 1      | NM_011856    | Odz2          | T <sub>F</sub> | intron4          | 36266        |
| chr11:46602963-46610042   | 2       | 0     | 2     | 2   | 0      | NM_134248    | Havcr1        | T <sub>F</sub> | intron3          | 21           |
| chr11:62784528-62790896   | 1       | 0     | 0     | 1   | 0      | NM_025496    | Cdrt4         | A              | intron1          | 16952        |
| chr11:81247063-81253478   | 1       | 0     | 0     | 2   | 0      | NM_001034013 | Accn1         | A              | intron1          | 459254       |
| chr11:104465308-104471679 | 1       | 0     | 0     | 1   | 0      | NM_016780    | Itgb3         | A              | intron10         | 3133         |

|                           |   |   |   |   |   |              |               |                |          |        |
|---------------------------|---|---|---|---|---|--------------|---------------|----------------|----------|--------|
| chr11:107921941-107928609 | 1 | 0 | 0 | 0 | 3 | NM_011101    | Prkca         | T <sub>F</sub> | intron3  | 47978  |
| chr12:37665034-37671832   | 2 | 0 | 0 | 2 | 1 | NM_008584    | Meox2         | T <sub>F</sub> | intron1  | 5749   |
| chr12:38548289-38554585   | 1 | 0 | 0 | 1 | 0 | NM_178681    | Dgkb          | G <sub>F</sub> | intron2  | 39963  |
| chr12:41647307-41653691   | 1 | 0 | 0 | 0 | 1 | NM_053122    | Immp2l        | A              | intron4  | 25941  |
| chr12:53031427 - 53038069 | 2 | 2 | 0 | 2 | 0 | NM_029760    | Nubpl         | T <sub>F</sub> | Intron4  | 4412   |
| chr12:83552473-83559347   | 1 | 0 | 0 | 0 | 3 | NM_015812    | Rgs6          | T <sub>F</sub> | intron1  | 11309  |
| chr12:83702324-83708519   | 1 | 0 | 0 | 0 | 1 | NM_015812    | Rgs6          | G <sub>F</sub> | intron2  | 131564 |
| chr12:91569522-91576320   | 1 | 0 | 0 | 0 | 2 | NM_181815    | 4930534B04Rik | A              | intron20 | 42801  |
| chr12:91872982-91880525   | 2 | 0 | 0 | 2 | 1 | NM_011648    | Tshr          | T <sub>F</sub> | intron1  | 18335  |
| chr12:116983009-116989624 | 1 | 0 | 0 | 3 | 0 | NM_011215    | Ptpn2         | A              | intron1  | 32783  |
| chr12:116999285-117005661 | 2 | 0 | 1 | 0 | 1 | NM_011215    | Ptpn2         | A              | intron1  | 16746  |
| chr12:117289453-117295493 | 1 | 0 | 0 | 1 | 0 | NM_011215    | Ptpn2         | T <sub>F</sub> | intron5  | 5358   |
| chr13:4064764-4075288     | 2 | 0 | 2 | 2 | 0 | NM_134072    | Akr1c14       | T <sub>F</sub> | intron3  | 77     |
| chr13:19066726-19073232   | 1 | 1 | 0 | 0 | 0 | NM_175007    | Amph          | T <sub>F</sub> | intron2  | 11563  |
| chr13:59111100-59117574   | 1 | 0 | 0 | 1 | 0 | NM_001025074 | Ntrk2         | T <sub>F</sub> | intron16 | 18481  |
| chr14:9402036-9408477     | 1 | 1 | 0 | 0 | 0 | NM_010210    | Fhit          | T <sub>F</sub> | intron4  | 114823 |
| chr14:34028687-34035616   | 1 | 0 | 1 | 0 | 0 | NM_008166    | Grid1         | G <sub>F</sub> | intron4  | 45169  |
| chr14:34226630-34233061   | 2 | 1 | 2 | 0 | 0 | NM_008166    | Grid1         | T <sub>F</sub> | intron8  | 40244  |
| chr14:34356295-34362958   | 1 | 0 | 2 | 0 | 0 | NM_008166    | Grid1         | A              | intron13 | 6319   |
| chr14:39753081-39759875   | 1 | 0 | 0 | 0 | 2 | NM_177816    | Sh2d4b        | A              | intron4  | 1778   |
| chr14:75804807-75811814   | 1 | 0 | 2 | 0 | 0 | NM_175369    | Ccdc122       | A              | intron3  | 1703   |
| chr14:85772172-85778665   | 1 | 0 | 0 | 2 | 0 | NM_019670    | Diap3         | T <sub>F</sub> | intron17 | 18523  |
| chr14:122547162-122555311 | 1 | 0 | 0 | 1 | 0 | NM_177393    | Vgcnl1        | A              | Intron12 | 2149   |
| chr14:123674576-123681530 | 2 | 0 | 2 | 2 | 0 | NM_207667    | Fgf14         | T <sub>F</sub> | intron1  | 178207 |
| chr15:21280148-21287315   | 1 | 0 | 1 | 0 | 0 | NM_001008420 | Cdh12         | T <sub>F</sub> | intron2  | 16132  |
| chr15:42971456-42978185   | 1 | 0 | 1 | 0 | 0 | NM_172815    | Rspo2         | T <sub>F</sub> | intron2  | 21619  |
| chr15:43347033-43353840   | 2 | 0 | 1 | 1 | 0 | NM_025736    | 4921531G14Rik | A              | intron10 | 3110   |
| chr15:44299187-44306422   | 2 | 0 | 1 | 1 | 0 | NM_138674    | Pkhd1l1       | A              | intron4  | 1203   |
| chr15:54274396-54280862   | 2 | 0 | 0 | 1 | 3 | NM_173422    | Colec10       | T <sub>F</sub> | intron3  | 5082   |
| chr15:71480024-71486814   | 1 | 0 | 1 | 0 | 0 | NM_177819    | A830008O07    | T <sub>F</sub> | intron1  | 28258  |
| chr16:11773215-11780072   | 1 | 0 | 0 | 0 | 4 | NM_146067    | C530044N13Rik | T <sub>F</sub> | intron2  | 21083  |
| chr16:28415494-28422500   | 1 | 0 | 0 | 1 | 0 | NM_010199    | Fgf12         | A              | intron2  | 101873 |
| chr16:45484189-45490573   | 1 | 0 | 0 | 1 | 0 | NM_198106    | Slc9a10       | A              | intron13 | 2086   |
| chr16:59836222-59842995   | 2 | 0 | 1 | 0 | 1 | NM_007938    | Epha6         | T <sub>F</sub> | intron11 | 15044  |
| chr16:64514474-64521088   | 1 | 0 | 0 | 0 | 3 | NM_173861    | Ckt2          | A              | intron1  | 28565  |
| chr16:66672539-66679189   | 1 | 0 | 1 | 0 | 0 | NM_178721    | Igsf4d        | A              | intron8  | 6902   |
| chr16:70434987-70441772   | 1 | 1 | 0 | 0 | 0 | NM_028803    | Gbe1          | A              | intron14 | 1931   |
| chr16:74088508-74094963   | 1 | 0 | 0 | 0 | 1 | NM_175549    | Robo2         | T <sub>F</sub> | intron2  | 140267 |
| chr17:10831296-10836431   | 1 | 1 | 0 | 0 | 0 | NM_016694    | Park2         | T <sub>F</sub> | intron1  | 74055  |
| chr17:11336892-11343759   | 3 | 2 | 0 | 3 | 2 | NM_016694    | Park2         | T <sub>F</sub> | intron6  | 740    |
| chr17:11597852-11603945   | 1 | 0 | 0 | 0 | 1 | NM_016694    | Park2         | T <sub>F</sub> | intron7  | 78014  |
| chr17:11853643-11862696   | 1 | 0 | 0 | 0 | 1 | NM_016694    | Park2         | A              | intron10 | 6157   |
| chr17:17258719-17265933   | 2 | 0 | 1 | 3 | 0 | NM_172827    | Lnpep         | T <sub>F</sub> | intron9  | 779    |
| chr17:21248130-21256413   | 3 | 0 | 1 | 1 | 2 | NM_144515    | Zfp52         | T <sub>F</sub> | intron2  | 3268   |
| chr17:44566936-44574510   | 2 | 1 | 0 | 2 | 0 | NM_178652    | Supt3h        | A              | intron11 | 8213   |
| chr17:57053720-57060073   | 1 | 0 | 1 | 0 | 0 | NM_010130    | Emr1          | T <sub>F</sub> | intron2  | 6651   |
| chr18:37157787-37164265   | 3 | 0 | 2 | 1 | 2 | NM_138663    | Pcdha12       | T <sub>F</sub> | intron1  | 9190   |
| chr18:53685854-53692113   | 1 | 0 | 0 | 1 | 0 | NM_001033281 | Prdm6         | T <sub>F</sub> | intron5  | 1411   |
| chr18:79023515-79030028   | 2 | 0 | 2 | 3 | 0 | NM_053099    | Setbp1        | T <sub>F</sub> | intron2  | 1505   |

|                          |   |   |   |   |   |              |               |                |          |        |
|--------------------------|---|---|---|---|---|--------------|---------------|----------------|----------|--------|
| chr19:11660086-11666881  | 1 | 0 | 0 | 4 | 0 | NM_022431    | Ms4a11        | A              | intron3  | 120    |
| chr19:22711341-22718778  | 3 | 0 | 2 | 1 | 1 | NM_177341    | Trpm3         | A              | intron1  | 45740  |
| chr19:32099385-32105758  | 1 | 1 | 0 | 0 | 0 | NM_018830    | Asah2         | G <sub>F</sub> | intron10 | 3719   |
| chr19:39465743-39473138  | 1 | 0 | 0 | 0 | 1 | NM_010002    | Cyp2c38       | A              | intron5  | 7630   |
| chr19:48279126-48285597  | 2 | 0 | 0 | 1 | 2 | NM_025696    | Sorcs3        | T <sub>F</sub> | intron1  | 19018  |
| chr19:50604387-50611198  | 2 | 0 | 0 | 1 | 1 | NM_021377    | Sorcs1        | A              | intron1  | 75624  |
| chr2:22216730-22222947   | 2 | 0 | 0 | 1 | 1 | NM_148413    | Myo3a         | A              | intron8  | 1258   |
| chr2:22281003-22287199   | 2 | 0 | 0 | 1 | 1 | NM_148413    | Myo3a         | F3             | intron15 | 1106   |
| chr2:41895503-41901678   | 1 | 1 | 0 | 0 | 0 | NM_053011    | Lrp1b         | T <sub>F</sub> | intron2  | 112716 |
| chr2:41905457-41912335   | 1 | 0 | 0 | 4 | 0 | NM_053011    | Lrp1b         | T <sub>F</sub> | intron2  | 122670 |
| chr2:42391707-42397997   | 1 | 0 | 0 | 0 | 2 | NM_053011    | Lrp1b         | T <sub>F</sub> | intron1  | 76746  |
| chr2:43990000-43996660   | 2 | 0 | 2 | 1 | 0 | NM_153820    | Arhgap15      | T <sub>F</sub> | intron10 | 1719   |
| chr2:54408963-54416013   | 3 | 1 | 1 | 0 | 1 | NM_173030    | Galnt13       | A              | intron3  | 76896  |
| chr2:62661888-62668147   | 1 | 0 | 1 | 0 | 0 | NM_133207    | Kcnh7         | T <sub>F</sub> | intron3  | 9893   |
| chr2:76251404-76258000   | 2 | 0 | 1 | 0 | 1 | NM_145525    | Osbpl6        | A              | intron1  | 42095  |
| chr2:102403734-102410545 | 1 | 0 | 0 | 2 | 0 | NM_173749    | E430002G05Rik | A              | intron4  | 155    |
| chr2:105743245-105749843 | 2 | 0 | 0 | 1 | 2 | NM_028260    | Immp1l        | A              | intron5  | 5288   |
| chr2:139592079-139600649 | 1 | 0 | 0 | 0 | 1 | NM_175225    | Tasp1         | A              | intron11 | 1324   |
| chr2:143316681-143323281 | 1 | 0 | 0 | 0 | 1 | NM_008792    | Pcsk2         | A              | intron2  | 51693  |
| chr2:144927733-144934117 | 2 | 0 | 1 | 0 | 2 | NM_053195    | Slc24a3       | A              | exon1    | -1     |
| chr2:161837475-161844326 | 2 | 1 | 0 | 1 | 0 | NM_021464    | Ptptrt        | G <sub>F</sub> | intron6  | 10529  |
| chr3:26953018-26959292   | 1 | 0 | 0 | 0 | 2 | NM_027583    | Spata16       | G <sub>F</sub> | intron3  | 9285   |
| chr3:32352816-32359464   | 3 | 1 | 0 | 1 | 1 | NM_028231    | Kcnmb2        | A              | intron3  | 5769   |
| chr3:58940075-58946886   | 1 | 0 | 0 | 1 | 0 | NM_153384    | Ush3a         | A              | intron3  | 5695   |
| chr3:65277296-65285455   | 2 | 1 | 0 | 0 | 2 | NM_010597    | Kcnab1        | T <sub>F</sub> | intron1  | 68964  |
| chr3:76172800-76179209   | 2 | 0 | 0 | 1 | 1 | NM_178673    | Fstl5         | A              | intron1  | 11899  |
| chr3:80828350-80835035   | 2 | 0 | 2 | 3 | 0 | NM_001039195 | Gria2         | T <sub>F</sub> | intron2  | 1225   |
| chr3:86415222-86422346   | 1 | 0 | 0 | 2 | 0 | NM_030695    | Lrba          | T <sub>F</sub> | intron22 | 939    |
| chr3:100254609-100261524 | 2 | 0 | 0 | 3 | 1 | NM_028892    | Spag17        | T <sub>F</sub> | intron47 | 106    |
| chr3:102961710-102968400 | 1 | 0 | 0 | 1 | 0 | NM_011516    | Sycp1         | T <sub>F</sub> | intron30 | 1522   |
| chr3:125894814-125900994 | 1 | 0 | 0 | 3 | 0 | NM_011674    | Ugt8a         | T <sub>F</sub> | intron2  | 5665   |
| chr3:141541027-141548015 | 2 | 0 | 0 | 2 | 1 | NM_009472    | Unc5c         | T <sub>F</sub> | intron1  | 67358  |
| chr3:141697348-141704009 | 2 | 0 | 2 | 2 | 0 | NM_009472    | Unc5c         | T <sub>F</sub> | intron5  | 1821   |
| chr3:156660245-156667112 | 3 | 0 | 1 | 1 | 1 | NM_177274    | Negr1         | A              | intron1  | 127617 |
| chr4:8118890-8125130     | 1 | 0 | 0 | 1 | 0 | NM_007592    | Car8          | T <sub>F</sub> | intron3  | 2351   |
| chr4:9512604-9519865     | 2 | 0 | 1 | 0 | 1 | NM_023066    | Asph          | A              | intron11 | 1601   |
| chr4:12880644-12887119   | 2 | 0 | 0 | 1 | 1 | NM_173746    | C130086A10    | T <sub>F</sub> | intron2  | 2972   |
| chr4:35231502-35237723   | 1 | 0 | 0 | 0 | 1 | NM_178061    | Mobkl2b       | T <sub>F</sub> | intron2  | 34933  |
| chr4:65841374-65848487   | 1 | 0 | 0 | 2 | 0 | NM_019514    | Astn2         | T <sub>F</sub> | intron1  | 41756  |
| chr4:69826506-69832701   | 2 | 1 | 0 | 0 | 1 | NM_145990    | Cdk5rap2      | A              | intron11 | 2586   |
| chr4:90045770-90052266   | 1 | 0 | 1 | 0 | 0 | NM_153096    | Zfp353        | T <sub>F</sub> | intron4  | 327887 |
| chr4:94283592-94290200   | 2 | 0 | 0 | 1 | 2 | NM_013690    | Tek           | A              | intron2  | 428    |
| chr4:94404625-94411613   | 2 | 0 | 2 | 1 | 0 | NM_027089    | 4930579C15Rik | T <sub>F</sub> | intron7  | 327    |
| chr4:101251511-101257860 | 1 | 0 | 0 | 2 | 0 | NM_010704    | Lepr          | A              | intron7  | 1374   |
| chr5:3987531-3994570     | 3 | 2 | 0 | 2 | 1 | NM_194462    | Akap9         | T <sub>F</sub> | intron14 | 311    |
| chr5:12548667-12555109   | 2 | 1 | 1 | 0 | 0 | NM_028882    | Sema3d        | A              | intron10 | 10     |
| chr5:21725851-21732250   | 2 | 1 | 1 | 0 | 0 | NM_011261    | Reln          | A              | intron3  | 7098   |
| chr5:27689680-27696387   | 1 | 0 | 0 | 2 | 0 | NM_010075    | Dpp6          | G <sub>F</sub> | intron1  | 17154  |
| chr5:72257979-72264056   | 1 | 0 | 0 | 0 | 2 | NM_008069    | Gabrb1        | T <sub>F</sub> | intron4  | 44905  |

|                          |   |   |   |   |   |              |               |                |          |        |
|--------------------------|---|---|---|---|---|--------------|---------------|----------------|----------|--------|
| chr5:82646162-82652399   | 1 | 0 | 1 | 0 | 0 | NM_198702    | Lphn3         | A              | intron10 | 10658  |
| chr5:98229019-98236145   | 1 | 0 | 0 | 0 | 2 | NM_133738    | Antxr2        | T <sub>F</sub> | intron7  | 7383   |
| chr5:102885436-102892267 | 1 | 0 | 0 | 0 | 1 | NM_146161    | Arhgap24      | A              | intron1  | 12117  |
| chr5:105262401-105268818 | 1 | 0 | 0 | 0 | 5 | NM_029509    | 5830443L24Rik | T <sub>F</sub> | intron4  | 2312   |
| chr5:128164138-128172293 | 1 | 0 | 0 | 0 | 1 | NM_172885    | Tmem132d      | G <sub>F</sub> | intron4  | 10197  |
| chr6:9089107-9095538     | 2 | 0 | 0 | 1 | 2 | NM_008751    | Nxph1         | T <sub>F</sub> | intron1  | 101546 |
| chr6:33589143-33595591   | 1 | 0 | 1 | 0 | 0 | NM_009148    | Exoc4         | T <sub>F</sub> | intron10 | 78907  |
| chr6:36154436-36160835   | 1 | 0 | 0 | 3 | 0 | NM_001033377 | 9330158H04Rik | A              | Intron4  | 12070  |
| chr6:45348678-45355085   | 1 | 0 | 0 | 2 | 0 | NM_001004357 | Cntnap2       | A              | intron1  | 228511 |
| chr6:45409274-45415970   | 1 | 0 | 0 | 2 | 0 | NM_001004357 | Cntnap2       | T <sub>F</sub> | intron1  | 167626 |
| chr6:63509387-63515893   | 1 | 0 | 1 | 0 | 0 | NM_008167    | Grid2         | A              | intron2  | 76362  |
| chr6:64307605-64313847   | 1 | 0 | 0 | 0 | 3 | NM_008167    | Grid2         | G <sub>F</sub> | intron11 | 10924  |
| chr6:95623527-95630225   | 2 | 0 | 0 | 2 | 2 | NM_011507    | Suc1g2        | T <sub>F</sub> | intron1  | 2465   |
| chr6:96887385-96893788   | 1 | 0 | 0 | 1 | 0 | NM_177233    | C130034I18Rik | T <sub>F</sub> | intron3  | 58007  |
| chr6:103540759-103548025 | 2 | 1 | 1 | 0 | 0 | NM_007697    | Chl1          | T <sub>F</sub> | intron2  | 14871  |
| chr6:108231651-108238996 | 1 | 0 | 0 | 1 | 0 | NM_010585    | Itpr1         | G <sub>F</sub> | intron4  | 24540  |
| chr6:111381312-111387899 | 1 | 0 | 0 | 1 | 0 | NM_177328    | Grm7          | T <sub>F</sub> | intron8  | 56455  |
| chr6:112618450-112625448 | 1 | 0 | 0 | 0 | 2 | NM_021385    | Rad18         | T <sub>F</sub> | intron9  | 2836   |
| chr6:114725043-114731214 | 1 | 0 | 0 | 0 | 2 | NM_028835    | Atg7          | A              | intron17 | 11361  |
| chr6:129822478-129829560 | 1 | 0 | 2 | 0 | 0 | NM_133203    | Klra17        | T <sub>F</sub> | intron6  | 1798   |
| chr6:146875952-146882231 | 1 | 0 | 0 | 1 | 0 | NM_026221    | Ppfbp1        | T <sub>F</sub> | intron1  | 13844  |
| chr7:16280016-16286317   | 1 | 1 | 0 | 0 | 0 | NM_007676    | Psg16         | G <sub>F</sub> | intron5  | 2779   |
| chr7:49922040-49928999   | 1 | 0 | 0 | 0 | 1 | NM_001037906 | Nell1         | T <sub>F</sub> | intron2  | 1639   |
| chr7:50009969-50017405   | 1 | 0 | 1 | 0 | 0 | NM_001037906 | Nell1         | A              | intron4  | 21248  |
| chr7:50063997-50070316   | 1 | 0 | 0 | 2 | 0 | NM_001037906 | Nell1         | G <sub>F</sub> | intron5  | 17286  |
| chr7:55002138-55009040   | 1 | 0 | 0 | 0 | 1 | NM_178705    | Luzp2         | G <sub>F</sub> | intron5  | 26178  |
| chr7:55943092-55949795   | 2 | 1 | 0 | 1 | 0 | NM_010418    | Herc2         | T <sub>F</sub> | intron4  | 2643   |
| chr7:56819560-56826130   | 2 | 0 | 1 | 0 | 1 | NM_008074    | Gabrg3        | A              | intron5  | 24513  |
| chr7:59162384-59168137   | 1 | 0 | 0 | 0 | 1 | NM_001033962 | Ube3a         | T <sub>F</sub> | intron9  | 3399   |
| chr7:64490291-64496709   | 1 | 0 | 0 | 3 | 0 | NM_007461    | Apba2         | A              | intron2  | 17271  |
| chr7:67152876-67159412   | 1 | 0 | 1 | 0 | 0 | NM_001033713 | Mef2a         | T <sub>F</sub> | intron4  | 5526   |
| chr7:89558468-89564188   | 2 | 0 | 0 | 4 | 1 | NM_181407    | Me3           | T <sub>F</sub> | intron1  | 47631  |
| chr7:89626117-89634603   | 1 | 0 | 0 | 0 | 1 | NM_181407    | Me3           | A              | intron3  | 10969  |
| chr7:91616784-91623619   | 2 | 0 | 0 | 4 | 1 | NM_011807    | Dlgh2         | A              | intron3  | 8448   |
| chr7:96066696-96073721   | 1 | 0 | 0 | 0 | 1 | NM_011858    | Odz4          | T <sub>F</sub> | intron1  | 20011  |
| chr7:97016144-97022588   | 2 | 0 | 2 | 1 | 0 | NM_010248    | Gab2          | T <sub>F</sub> | intron1  | 59046  |
| chr7:133938788-133945823 | 1 | 0 | 0 | 2 | 0 | NM_007400    | Adam12        | A              | intron3  | 27238  |
| chr8:16216361-16222863   | 1 | 0 | 0 | 0 | 1 | NM_053171    | Csmd1         | T <sub>F</sub> | intron17 | 337    |
| chr8:16361110-16367113   | 1 | 0 | 2 | 0 | 0 | NM_053171    | Csmd1         | A              | intron8  | 2681   |
| chr8:39022462-39028961   | 2 | 0 | 2 | 4 | 0 | NM_145841    | Sgcx          | G <sub>F</sub> | intron4  | 2696   |
| chr8:39040809-39047167   | 1 | 0 | 0 | 1 | 0 | NM_145841    | Sgcx          | T <sub>F</sub> | intron3  | 9029   |
| chr8:39095784-39102293   | 2 | 1 | 0 | 1 | 0 | NM_145841    | Sgcx          | T <sub>F</sub> | intron3  | 6156   |
| chr8:39133214-39139435   | 2 | 0 | 1 | 1 | 0 | NM_145841    | Sgcx          | A              | intron2  | 24677  |
| chr8:39313950-39320299   | 1 | 0 | 0 | 0 | 1 | NM_145841    | Sgcx          | G <sub>F</sub> | intron1  | 101080 |
| chr8:65960989-65968051   | 2 | 0 | 0 | 1 | 2 | NM_023689    | Spock3        | T <sub>F</sub> | intron3  | 37681  |
| chr8:68633078-68641000   | 1 | 0 | 0 | 1 | 0 | NM_175188    | March1.       | T <sub>F</sub> | intron1  | 85326  |
| chr8:68759481-68766057   | 1 | 0 | 0 | 3 | 0 | NM_175188    | March1.       | A              | intron1  | 42261  |
| chr8:71498913-71505117   | 2 | 0 | 0 | 4 | 1 | NM_172753    | 4732435N03Rik | A              | intron2  | 12804  |
| chr8:75864022-75870567   | 2 | 0 | 1 | 0 | 5 | NM_010687    | Large         | T <sub>F</sub> | intron6  | 55790  |

|                          |   |   |   |   |   |              |               |                |          |       |
|--------------------------|---|---|---|---|---|--------------|---------------|----------------|----------|-------|
| chr8:84850325-84857221   | 2 | 0 | 0 | 1 | 1 | NM_001024617 | Inpp4b        | G <sub>F</sub> | intron11 | 1786  |
| chr8:84930266-84936585   | 3 | 1 | 1 | 1 | 0 | NM_001024617 | Inpp4b        | F <sub>2</sub> | intron17 | 15    |
| chr8:88803986-88810627   | 2 | 0 | 1 | 1 | 0 | NM_199446    | Phkb          | A              | intron7  | 1604  |
| chr8:94307055-94313971   | 1 | 1 | 0 | 0 | 0 | NM_011936    | Fto           | G <sub>F</sub> | intron3  | 7109  |
| chr9:53757309-53763536   | 3 | 0 | 1 | 2 | 1 | NM_177769    | Elmod1        | T <sub>F</sub> | intron1  | 9625  |
| chr9:55764431-55770807   | 4 | 1 | 3 | 1 | 1 | NM_183111    | 4930563M21Rik | A              | intron7  | 1019  |
| chr9:59843505-59849814   | 2 | 0 | 1 | 0 | 1 | NM_172444    | Thsd4         | T <sub>F</sub> | intron2  | 5042  |
| chr9:70702943-70709466   | 1 | 0 | 1 | 0 | 0 | NM_008280    | Lipc          | T <sub>F</sub> | intron1  | 24226 |
| chr9:106776523-106782837 | 1 | 0 | 0 | 1 | 0 | NM_153413    | Dock3         | G <sub>F</sub> | intron41 | 3757  |
| chrX:44110999-44118357   | 3 | 1 | 0 | 3 | 1 | NM_053123    | Smarca1       | T <sub>F</sub> | intron9  | 424   |
| chrX:65890227-65897096   | 1 | 0 | 1 | 0 | 0 | NM_008032    | Aff2          | T <sub>F</sub> | intron3  | 57512 |
| chrX:68865579-68872496   | 1 | 0 | 0 | 1 | 0 | NM_008067    | Gabra3        | G <sub>F</sub> | intron1  | 36230 |
| chrX:94807349-94812337   | 1 | 0 | 1 | 0 | 0 | NM_052976    | Ophn1         | A              | intron19 | 7455  |
| chrX:96204427-96212062   | 2 | 0 | 1 | 1 | 0 | NM_010099    | Eda           | A              | intron1  | 25532 |
| chrX:110650043-110656468 | 1 | 0 | 0 | 1 | 0 | NM_172781    | Klhl4         | A              | intron5  | 2864  |
| chrX:136807474-136815063 | 1 | 0 | 0 | 3 | 0 | NM_007736    | Col4a5        | T <sub>F</sub> | intron5  | 2267  |
| chrX:138109216-138115539 | 1 | 0 | 0 | 1 | 0 | NM_019496    | Ammecr1       | T <sub>F</sub> | intron3  | 3877  |
| chrX:145955068-145961465 | 1 | 0 | 0 | 1 | 0 | NM_008824    | Pfkfb1        | A              | intron5  | 19    |
| chrX:152627074-152633781 | 1 | 0 | 0 | 1 | 0 | NM_011077    | Phex          | T <sub>F</sub> | intron12 | 14475 |

205 full-length AS L1 polymorphisms, absent from at least one of the unassembled strains,

were identified within the coding sequence of RefSeq genes in the reference genome.

Almost all are intronic. The number of strains with the L1 polymorphism absent is presented along with the number of WGS indel traces for each strain. Zeroes indicate no sequence traces supporting an indel, i.e. either well-aligned traces or insufficient sequence coverage. RT-PCR assays for both L1 fusion transcripts and native transcripts were performed on total RNA isolated from adult testes for each of the five mouse strains (*yellow highlights*). Fusion transcripts were detected in adult testes only from strains containing the L1 polymorphisms (*green*). At *Arhgap15*, a fusion L1-gene transcript was detected in a different screen (*blue*; see Table 2).

Supplementary Table 10. **Significant changes in non-polymorphic L1s or reference L1s within genes in various ontological categories.**

Annotated genes containing 26,104 distinct intronic L1 non-polymorphisms (integrants present in all five strains) or 132,849 reference L1s were identified, respectively. They were assigned to top-level ontological categories (including biological processes and molecular functions) using Gene Ontology (GO) Panther software. Because more than one ontological category can be assigned to a given gene, a total of 44,715 or 226,409 assignments were made for these non-polymorphic or reference L1s, respectively. Only statistically significant differences in ontological categories (corrected p-values < 0.01) are listed here. Enrichments or exclusions of polymorphic L1s and additional information about methods are presented in Table 4.

(A) - (D) *In silico* simulations resulted in 2,045,793 random “integrants”. Their annotated (A) and (B) biological processes and (C) and (D) molecular functions were determined for intronic (A) and (C) non-polymorphic or (B) and (D) reference L1 integrants.

(E) and (F) We compared the ontological categories of non-polymorphic L1 genes against reference L1 genes, identifying their annotated (E) biological processes and (F) molecular functions (Mi et al. 2005).

## (A) Non-polymorphic L1s vs random simulation: biological processes

| biological process                                 | intronic non-polymorphic L1, % | random simulation, % | fold-change | p-value  |
|----------------------------------------------------|--------------------------------|----------------------|-------------|----------|
| Neuronal activities                                | 9.46                           | 7.07                 | 1.34        | 0.00E+00 |
| Nucleoside, nucleotide and nucleic acid metabolism | 10.78                          | 13.42                | 0.80        | 1.03E-36 |
| Sensory perception                                 | 1.75                           | 2.32                 | 0.75        | 3.83E-09 |
| Cell adhesion                                      | 7.22                           | 6.37                 | 1.13        | 5.33E-07 |
| Biological process unclassified                    | 30.04                          | 28.62                | 1.05        | 7.78E-06 |
| Oncogenesis                                        | 2.11                           | 2.57                 | 0.82        | 2.98E-05 |
| Other metabolism                                   | 1.95                           | 2.38                 | 0.82        | 3.05E-05 |
| Transport                                          | 9.3                            | 8.6                  | 1.08        | 1.28E-03 |
| Signal transduction                                | 24.5                           | 23.47                | 1.04        | 1.60E-03 |
| Amino acid metabolism                              | 0.77                           | 0.98                 | 0.79        | 8.07E-03 |

## (B) Reference L1s vs random simulation: biological processes

| biological process                                 | intronic reference L1, % | random simulation, % | fold-change | p-value   |
|----------------------------------------------------|--------------------------|----------------------|-------------|-----------|
| Neuronal activities                                | 9.46                     | 7.07                 | 1.34        | 0.00E+00  |
| Cell adhesion                                      | 7.12                     | 6.37                 | 1.12        | 0.00E+00  |
| Transport                                          | 9.29                     | 8.6                  | 1.08        | 0.00E+00  |
| Signal transduction                                | 24.58                    | 23.47                | 1.05        | 0.00E+00  |
| Lipid fatty acid and steroid metabolism            | 4.5                      | 4.05                 | 1.11        | 0.00E+00  |
| Nucleoside, nucleotide and nucleic acid metabolism | 11.13                    | 13.42                | 0.83        | 1.18E-137 |
| Sensory perception                                 | 1.85                     | 2.32                 | 0.80        | 3.08E-31  |
| Cell structure and motility                        | 6.46                     | 7.21                 | 0.90        | 1.72E-25  |
| Cell proliferation and differentiation             | 4.05                     | 4.52                 | 0.90        | 1.57E-15  |
| Amino acid metabolism                              | 0.77                     | 0.98                 | 0.79        | 1.72E-13  |
| Apoptosis                                          | 2.21                     | 2.53                 | 0.87        | 2.06E-13  |
| Cell cycle                                         | 3.96                     | 4.38                 | 0.90        | 3.65E-13  |
| Muscle contraction                                 | 1.35                     | 1.58                 | 0.85        | 1.49E-10  |
| Other metabolism                                   | 2.12                     | 2.38                 | 0.89        | 1.94E-09  |
| Protein metabolism and modification                | 14.29                    | 14.91                | 0.96        | 2.86E-09  |
| Biological process unclassified                    | 29.39                    | 28.62                | 1.03        | 4.33E-09  |
| Electron transport                                 | 1.17                     | 1.01                 | 1.16        | 8.21E-08  |
| Blood circulation and gas exchange                 | 0.18                     | 0.25                 | 0.72        | 1.50E-05  |
| Oncogenesis                                        | 2.37                     | 2.57                 | 0.92        | 5.57E-05  |
| Intracellular protein traffic                      | 5.54                     | 5.83                 | 0.95        | 6.90E-05  |
| Protein targeting and localization                 | 1.39                     | 1.27                 | 1.09        | 5.85E-04  |



## (C) Non-polymorphic L1s vs random simulation: molecular functions

| molecular function              | intronic non-polymorphic L1, % | random simulation, % | fold-change | p-value  |
|---------------------------------|--------------------------------|----------------------|-------------|----------|
| Receptor                        | 12.06                          | 10.71                | 1.13        | 0.00E+00 |
| Ion channel                     | 4.83                           | 3.96                 | 1.22        | 0.00E+00 |
| Transcription factor            | 6.23                           | 8.35                 | 0.75        | 5.58E-37 |
| Nucleic acid binding            | 7.91                           | 10.1                 | 0.78        | 7.20E-33 |
| Isomerase                       | 0.9                            | 0.67                 | 1.34        | 2.63E-04 |
| Molecular function unclassified | 27.31                          | 26.35                | 1.04        | 6.76E-03 |

## (D) Reference L1s vs random simulation: molecular functions

| molecular function              | intronic reference L1, % | random simulation, % | fold-change | p-value   |
|---------------------------------|--------------------------|----------------------|-------------|-----------|
| Receptor                        | 12.28                    | 10.71                | 1.15        | 0.00E+00  |
| Nucleic acid binding            | 8                        | 10.1                 | 0.79        | 2.03E-151 |
| Transcription factor            | 7.01                     | 8.35                 | 0.84        | 1.01E-72  |
| Isomerase                       | 0.83                     | 0.67                 | 1.24        | 2.83E-09  |
| Ion channel                     | 4.9                      | 3.96                 | 1.24        | 3.34E-09  |
| Cell adhesion molecule          | 4.26                     | 3.94                 | 1.08        | 2.75E-08  |
| Chaperone                       | 0.37                     | 0.45                 | 0.82        | 2.54E-04  |
| Molecular function unclassified | 26.86                    | 26.35                | 1.02        | 2.87E-04  |
| Protease                        | 2.87                     | 2.69                 | 1.07        | 7.80E-04  |
| Phosphatase                     | 1.93                     | 2.08                 | 0.93        | 8.42E-04  |
| Transfer/carrier protein        | 1.4                      | 1.52                 | 0.92        | 5.10E-03  |

## (E) Non-polymorphic L1s vs reference L1s: biological processes

| biological process                  | intronic non-polymorphic L1, % | reference L1, % | fold-change | p-value  |
|-------------------------------------|--------------------------------|-----------------|-------------|----------|
| Protein metabolism and modification | 15.05                          | 14.29           | 1.05        | 8.20E-03 |

## (F) Non-polymorphic L1s vs reference L1s: molecular functions

| molecular function   | intronic non-polymorphic L1, % | reference L1, % | fold-change | p-value  |
|----------------------|--------------------------------|-----------------|-------------|----------|
| Transcription factor | 6.23                           | 7.01            | 0.89        | 9.03E-06 |

## Supplementary References.

- Chen, J., A. Rattner, and J. Nathans. 2006. Effects of L1 retrotransposon insertion on transcript processing, localization and accumulation: lessons from the retinal degeneration 7 mouse and implications for the genomic ecology of L1 elements. *Hum Mol Genet* **15**: 2146-2156.
- DeBerardinis, R.J., J.L. Goodier, E.M. Ostertag, and H.H. Kazazian, Jr. 1998. Rapid amplification of a retrotransposon subfamily is evolving the mouse genome. *Nat Genet* **20**: 288-290.
- Goodier, J.L., E.M. Ostertag, K. Du, and H.H. Kazazian, Jr. 2001. A novel active L1 retrotransposon subfamily in the mouse. *Genome Res* **11**: 1677-1685.
- Hinrichs, A.S., D. Karolchik, R. Baertsch, G.P. Barber, G. Bejerano, H. Clawson, M. Diekhans, T.S. Furey, R.A. Harte, F. Hsu et al. 2006. The UCSC Genome Browser Database: update 2006. *Nucleic Acids Res* **34**: D590-598.
- Li, J., M. Kannan, and D.E. Symer. 2008. Diverse fusion transcripts are initiated by a novel antisense promoter in mouse L1 retrotransposons. *Submitted for publication*.
- Mi, H., B. Lazareva-Ulitsky, R. Loo, A. Kejariwal, J. Vandergriff, S. Rabkin, N. Guo, A. Muruganujan, O. Doremieux, M.J. Campbell et al. 2005. The PANTHER database of protein families, subfamilies, functions and pathways. *Nucleic Acids Res* **33**: D284-288.
- Saxton, J.A. and S.L. Martin. 1998. Recombination between subtypes creates a mosaic lineage of LINE-1 that is expressed and actively retrotransposing in the mouse genome. *J Mol Biol* **280**: 611-622.
- Smit, A.F.A., R. Hubley, and P. Green. 2007. RepeatMasker.
- Stephens, R.M., K. Akagi, J.R. Collins, B. Neelam, D. McCullough, N. Volfovsky, and D.E. Symer. 2008. PolyBrowse: An interface to access, query and display mouse genomic variation. *Submitted for publication*.
- Symer, D.E., C. Connelly, S.T. Szak, E.M. Caputo, G.J. Cost, G. Parmigiani, and J.D. Boeke. 2002. Human L1 retrotransposition is associated with genetic instability in vivo. *Cell* **110**: 327-338.
- Szak, S.T., O.K. Pickeral, W. Makalowski, M.S. Boguski, D. Landsman, and J.D. Boeke. 2002. Molecular archeology of L1 insertions in the human genome. *Genome Biol* **3**: research0052.
- Wade, C.M. and M.J. Daly. 2005. Genetic variation in laboratory mice. *Nat Genet* **37**: 1175-1180.
- Wade, C.M., E.J. Kulbokas, 3rd, A.W. Kirby, M.C. Zody, J.C. Mullikin, E.S. Lander, K. Lindblad-Toh, and M.J. Daly. 2002. The mosaic structure of variation in the laboratory mouse genome. *Nature* **420**: 574-578.
- Wiltshire, T., M.T. Pletcher, S. Batalov, S.W. Barnes, L.M. Tarantino, M.P. Cooke, H. Wu, K. Smylie, A. Santosyan, N.G. Copeland et al. 2003. Genome-wide single-nucleotide polymorphism analysis defines haplotype patterns in mouse. *Proc Natl Acad Sci U S A* **100**: 3380-3385.
- Wu, T.D. and C.K. Watanabe. 2005. GMAP: a genomic mapping and alignment program for mRNA and EST sequences. *Bioinformatics* **21**: 1859-1875.
